# Supplementary material
Source: PubMed Central journal article supplement (PMC10189564)
Supplement: jama-e235942-s001.pdf [file jama-e235942-s001.pdf]

## Supplemental Online Content

Joseph P, Roy A, Lonn E, et al. Global variations in heart failure etiology, management, and outcomes. *JAMA*. doi:10.1001/jama.2023.5942

**eTable 1.** Summary of Countries by Region and Countries Grouped by Income Status

**eTable 2.** Proportion of Missing Data for Variables Collected at Baseline for This Analysis

**eTable 3.** Causes of Heart Failure by Country Income Level

**eTable 4.** Use of Heart Failure Therapies in HFrEF by Country Income Level

**eTable 5.** Hazard Ratios for Death by Country Income Level After Adjusting for Patient Level Risk Factors in Participants With a Documented LVEF <40%

**eTable 6.** Analysis of Risk of Death in Participants Stratified by i) Duration on Known Heart Failure Prior to Enrollment and ii) Inpatient Versus Outpatient Enrollment

**eFigure 1.** Age- and Sex-Standardized Rates of Death and First Hospitalization for Any Cause by Countries Grouped by Income Level

**eFigure 2.** Country-Level Correlations of Gross National Income With the Rate of Death and the Rate of First Hospitalization

**eFigure 3.** Crude 30-Day Case Fatality From the Time of the First Hospital Admission, Which Was Due to A) Any Cause, B) Heart Failure, and C) Cause Other Than Heart Failure

**eAppendix 1.** Description of Study Follow-up

**eAppendix 2.** National Leaders (NLs), Principal Investigators (PIs), Co-Investigators (Co-Is), and Sub-Investigators (Sub-Is)

This supplemental material has been provided by the authors to give readers additional information about their work.

**eTable 1. Summary of Countries by Region and Countries Grouped by Income Status**

| <b>Country Status</b> | <b>Income</b> | <b>Countries</b>                                                                                                                                             |
|-----------------------|---------------|--------------------------------------------------------------------------------------------------------------------------------------------------------------|
| HICs                  |               | Canada, United States<br>UK, Ireland, France, Italy, Switzerland,<br>Germany, Sweden, Iceland, Spain, Portugal,<br>Denmark, Poland, Chile, Saudi Arabia, UAE |
| UMICs                 |               | Russia, China, South Africa, Mexico,<br>Brazil, Argentina, Colombia, Turkey, Ecuador, Botswana                                                               |
| LMICs                 |               | Ukraine, India, Philippines, Pakistan,<br>Sudan, Nigeria, Cameroon, Kenya, Egypt                                                                             |
| LICs                  |               | Mozambique, Tanzania, Uganda, Nepal                                                                                                                          |

HICs = high-income countries, LICs = low-income countries, LMICs = lower-middle-income countries, UMICs = upper-middle-income countries

**eTable 2. Proportion of Missing Data for Variables Collected at Baseline for This Analysis**

| <b>Variable</b>                                                                | <b>Missing data from 23,341 participant cohort<br/>N (%)</b> |
|--------------------------------------------------------------------------------|--------------------------------------------------------------|
| Age                                                                            | 1 (0.004)                                                    |
| Sex                                                                            | 0 (0)                                                        |
| In-patient                                                                     | 0 (0)                                                        |
| Education                                                                      | 93 (0.4)                                                     |
| HF etiology                                                                    | 42 (0.2)                                                     |
| HF duration                                                                    | 5 (0.02)                                                     |
| Renal function categories                                                      | 2 (0.009)                                                    |
| Systolic blood pressure                                                        | 66 (0.3)                                                     |
| Hypertension                                                                   | 2 (0.009)                                                    |
| Diabetes                                                                       | 2 (0.009)                                                    |
| Body mass index                                                                | 572 (2.4)                                                    |
| Tobacco Use                                                                    | 36 (0.2)                                                     |
| Alcohol Use                                                                    | 66 (0.3)                                                     |
| COPD                                                                           | 2 (0.009)                                                    |
| Left ventricular ejection fraction data missing                                | 493 (2.1)                                                    |
| No echo performed in last year to document left ventricular ejection fraction* | 3661 (15.7)                                                  |
| New York Heart Association Class                                               | 114 (0.5)                                                    |
| β-blocker                                                                      | 8 (0.03)                                                     |
| Renin-angiotensin system inhibitor                                             | 8 (0.03)                                                     |
| Mineralocorticoid receptor antagonist                                          | 10 (0.04)                                                    |
| Implantable cardioverter defibrillator                                         | 2 (0.009)                                                    |

\*In these cases, the left ventricular ejection fraction was not collected

**eTable 3. Causes of Heart Failure by Country Income Level**

|                                                 | <b>Overall<br/>N = 23,299</b> | <b>HICs<br/>N = 8675</b> | <b>UMICs<br/>N = 5777</b> | <b>LMICs<br/>N = 6937</b> | <b>LICs<br/>N = 1910</b> | <b>p-<br/>value</b> |
|-------------------------------------------------|-------------------------------|--------------------------|---------------------------|---------------------------|--------------------------|---------------------|
| Ischemic                                        | 8899 (38.2)                   | 3804 (43.9)              | 2696 (46.7)               | 2014 (29.0)               | 385 (20.2)               | <0.001              |
| Hypertension                                    | 4709 (20.2)                   | 1161 (13.4)              | 1110 (19.2)               | 1930 (27.8)               | 508 (26.6)               | <0.001              |
| Dilated                                         | 3590 (15.4)                   | 1452 (16.7)              | 699 (12.1)                | 1000 (14.4)               | 439 (23.0)               | <0.001              |
| Valvular: Rheumatic                             | 1133 (4.9)                    | 115 (1.3)                | 203 (3.5)                 | 594 (8.6)                 | 221 (11.6)               | <0.001              |
| Valvular: Non-Rheumatic                         | 944 (4.1)                     | 435 (5.0)                | 221 (3.8)                 | 238 (3.4)                 | 50 (2.6)                 | <0.001              |
| Other                                           | 4024 (17.2)                   | 1708 (19.7)              | 848 (14.7)                | 1161 (16.8)               | 307 (16.0)               | <0.001              |
| Tachycardia mediated                            | 682 (2.9)                     | 410 (4.7)                | 127 (2.2)                 | 130 (1.9)                 | 15 (0.8)                 |                     |
| Peripartum cardiomyopathy                       | 492 (2.1)                     | 26 (0.3)                 | 36 (0.6)                  | 332 (4.8)                 | 98 (5.1)                 |                     |
| Hypertrophic                                    | 363 (1.6)                     | 164 (1.9)                | 116 (2.0)                 | 66 (1.0)                  | 17 (0.9)                 |                     |
| Alcohol                                         | 279 (1.2)                     | 155 (1.8)                | 25 (0.4)                  | 63 (0.9)                  | 36 (1.9)                 |                     |
| Chemotherapy or radiotherapy related            | 150 (0.6)                     | 117 (1.3)                | 18 (0.3)                  | 8 (0.1)                   | 7 (0.4)                  |                     |
| Congenital heart disease                        | 146 (0.6)                     | 65 (0.7)                 | 35 (0.6)                  | 39 (0.6)                  | 7 (0.4)                  |                     |
| Cor Pulmonale                                   | 131 (0.6)                     | 18 (0.2)                 | 52 (0.9)                  | 34 (0.5)                  | 27 (1.4)                 |                     |
| Metabolic, endocrine, or renal related          | 112 (0.5)                     | 39 (0.4)                 | 38 (0.7)                  | 26 (0.4)                  | 9 (0.5)                  |                     |
| Chagas' Disease                                 | 92 (0.4)                      | 3 (0.0)                  | 87 (1.5)                  | 2 (0.0)                   | 0 (0.0)                  |                     |
| Viral or other myocarditis                      | 78 (0.3)                      | 39 (0.4)                 | 17 (0.3)                  | 21 (0.3)                  | 1 (0.1)                  |                     |
| HIV cardiomyopathy                              | 66 (0.3)                      | 2 (0.0)                  | 14 (0.2)                  | 23 (0.3)                  | 27 (1.4)                 |                     |
| Infiltrative cardiomyopathy                     | 49 (0.2)                      | 32 (0.4)                 | 8 (0.1)                   | 8 (0.1)                   | 1 (0.1)                  |                     |
| Endomyocardial fibrosis                         | 44 (0.2)                      | 14 (0.2)                 | 12 (0.2)                  | 11 (0.2)                  | 7 (0.4)                  |                     |
| Tuberculosis related                            | 27 (0.1)                      | 1 (0.0)                  | 8 (0.1)                   | 12 (0.2)                  | 6 (0.3)                  |                     |
| Familial cardiomyopathy                         | 26 (0.1)                      | 23 (0.3)                 | 1 (0.0)                   | 2 (0.0)                   | 0 (0.0)                  |                     |
| Pericardial disease related                     | 25 (0.1)                      | 9 (0.1)                  | 0 (0.0)                   | 12 (0.2)                  | 4 (0.2)                  |                     |
| Sarcoidosis                                     | 21 (0.1)                      | 21 (0.2)                 | 0 (0.0)                   | 0 (0.0)                   | 0 (0.0)                  |                     |
| ARVC                                            | 19 (0.1)                      | 7 (0.1)                  | 12 (0.2)                  | 0 (0.0)                   | 0 (0.0)                  |                     |
| Non-compaction cardiomyopathy                   | 17 (0.1)                      | 9 (0.1)                  | 6 (0.1)                   | 2 (0.0)                   | 0 (0.0)                  |                     |
| Sepsis                                          | 14 (0.1)                      | 6 (0.1)                  | 6 (0.1)                   | 0 (0.0)                   | 2 (0.1)                  |                     |
| Pacemaker related                               | 12 (0.1)                      | 11 (0.1)                 | 1 (0.0)                   | 0 (0.0)                   | 0 (0.0)                  |                     |
| Bradycardia                                     | 12 (0.1)                      | 3 (0.0)                  | 2 (0.0)                   | 2 (0.0)                   | 5 (0.3)                  |                     |
| Connective tissue or autoimmune disease related | 12 (0.1)                      | 8 (0.1)                  | 3 (0.1)                   | 1 (0.0)                   | 0 (0.0)                  |                     |
| Takotsubo cardiomyopathy                        | 7 (0.0)                       | 7 (0.1)                  | 0 (0.0)                   | 0 (0.0)                   | 0 (0.0)                  |                     |
| High output                                     | 7 (0.0)                       | 2 (0.0)                  | 0 (0.0)                   | 1 (0.0)                   | 4 (0.2)                  |                     |
| Post heart transplant                           | 5 (0.0)                       | 2 (0.0)                  | 3 (0.1)                   | 0 (0.0)                   | 0 (0.0)                  |                     |
| Other or unknown cause                          | 1136 (4.9)                    | 515 (5.9)                | 221 (3.8)                 | 366 (5.3)                 | 34 (1.8)                 |                     |

ARVC = arrhythmogenic right ventricular cardiomyopathy, HF = heart failure, HICs = high-income countries, HIV = human immunodeficiency virus, LICs = low-income countries, LMICs = lower-middle-income countries, UMICs = upper-middle-income countries

**eTable 4. Use of Heart Failure Therapies in HFrEF by Country Income Level**

|                                                     | Overall     | HICs        | UMICs       | LMICs       | LICs        | p-value |
|-----------------------------------------------------|-------------|-------------|-------------|-------------|-------------|---------|
| n                                                   | 11642       | 4263        | 2554        | 3685        | 1140        |         |
| B-Blocker                                           | 9833 (84.5) | 3997 (93.8) | 2293 (89.8) | 2708 (73.5) | 835 (73.2)  | <0.001  |
| RAS inhibitor                                       | 9329 (80.1) | 3700 (86.8) | 2148 (84.1) | 2498 (67.8) | 983 (86.2)  | <0.001  |
| ACEi                                                | 5717 (49.1) | 2015 (47.3) | 1245 (48.7) | 1799 (48.8) | 658 (57.7)  | <0.001  |
| ARB                                                 | 2477 (21.3) | 834 (19.6)  | 668 (26.2)  | 649 (17.6)  | 326 (28.6)  | <0.001  |
| Sacubitril/<br>Valsartan                            | 1227 (10.5) | 899 (21.1)  | 262 (10.3)  | 64 (1.7)    | 2 (0.2)     | <0.001  |
| MRA                                                 | 7587 (65.2) | 2469 (57.9) | 1972 (77.2) | 2454 (66.6) | 692 (60.7)  | <0.001  |
| Digoxin                                             | 2244 (19.3) | 426 (10.0)  | 557 (21.8)  | 892 (24.2)  | 369 (32.4)  | <0.001  |
| Ivabradine                                          | 621 (5.3)   | 199 (4.7)   | 144 (5.6)   | 267 (7.2)   | 11 (1.0)    | <0.001  |
| Hydralazine                                         | 298 (2.6)   | 160 (3.8)   | 28 (1.1)    | 95 (2.6)    | 15 (1.3)    | <0.001  |
| Diuretics                                           | 9699 (83.3) | 3309 (77.6) | 1995 (78.1) | 3342 (90.7) | 1053 (92.4) | <0.001  |
| Nitrates                                            | 1381 (11.9) | 392 (9.2)   | 312 (12.2)  | 521 (14.1)  | 156 (13.7)  | <0.001  |
| Combination of $\beta$ -Blocker, RAS inhibitor, MRA |             |             |             |             |             | <0.001  |
| 0                                                   | 274 (2.4)   | 44 (1.0)    | 25 (1.0)    | 170 (4.6)   | 35 (3.1)    |         |
| 1                                                   | 1714 (14.7) | 449 (10.5)  | 224 (8.8)   | 820 (22.3)  | 221 (19.4)  |         |
| 2                                                   | 3917 (33.7) | 1592 (37.4) | 723 (28.3)  | 1239 (33.6) | 363 (31.8)  |         |
| 3                                                   | 5733 (49.3) | 2177 (51.1) | 1581 (61.9) | 1454 (39.5) | 521 (45.7)  |         |
| Implantable cardioverter-defibrillator*             | 1329 (14.5) | 1031 (30.3) | 260 (13.5)  | 35 (1.2)    | 3 (0.3)     | <0.001  |

\*Reported in the subset of 9192 participants with EF  $\leq$  35%. ACEi = angiotensin converting enzyme inhibitor, ARB = angiotensin receptor blocker, HICs = high-income countries, LICs = low-income countries, LMICs = lower-middle-income countries, MRA = mineralocorticoid receptor antagonist, UMICs = upper-middle-income countries

**eTable 5. Hazard Ratios for Death by Country Income Level After Adjusting for Patient Level Risk Factors in Participants With a Documented LVEF  $\leq$ 40%**

|              | <b>Model 1:<br/>Age and sex adjusted<br/>HR (95% CI)</b> | <b>p-value</b> | <b>Model 2:<br/>Adjusted for patient<br/>characteristics and heart<br/>failure therapies<br/>HR (95% CI)</b> | <b>p-value</b> |
|--------------|----------------------------------------------------------|----------------|--------------------------------------------------------------------------------------------------------------|----------------|
| <b>HICs</b>  | Reference                                                |                | Reference                                                                                                    |                |
| <b>UMICs</b> | 1.27<br>(1.14-1.41)                                      | <0.001         | 1.16<br>(1.04 -1.30)                                                                                         | 0.02           |
| <b>LMICs</b> | 2.01<br>(1.84-2.20)                                      | <0.001         | 1.59<br>(1.42-1.77)                                                                                          | <0.001         |
| <b>LICs</b>  | 2.48<br>(2.21-2.79)                                      | <0.001         | 2.41<br>(2.11-2.76)                                                                                          | <0.001         |

Model 1: Age and sex adjusted

Model 2: Model 1 + clinical characteristics (BMI, diabetes, COPD, current tobacco use, stage 4-5 kidney dysfunction, NYHA class, HF duration >12 months) + HF etiology [ischemic, dilated, rheumatic valvular, non-rheumatic valvular, other] + in-patient recruitment + education level + chronic HF treatments ( $\beta$ -blocker, RAS inhibitor, MRA, ICD).

CI = confidence interval, HICs = high-income countries, HR = hazard ratio, LICs = low-income countries, LMICs = lower-middle-income countries, UMICs = upper-middle-income countries.

**eTable 6. Analysis of Risk of Death in Participants Stratified by i) Duration on Known Heart Failure Prior to Enrollment and ii) Inpatient Versus Outpatient Enrollment**

i) Heart Failure Duration

|                                    | HR (95% CI)      | p-value for interaction |
|------------------------------------|------------------|-------------------------|
|                                    |                  | <0.001                  |
| Heart failure duration ≤ 12 months |                  |                         |
| HICs                               | Reference        |                         |
| UMICs                              | 1.16 (0.98-1.38) |                         |
| LMICs                              | 1.39 (1.19-1.62) |                         |
| LICs                               | 2.24 (1.87-2.67) |                         |
| Heart failure duration > 12 months |                  |                         |
| HICs                               | Reference        |                         |
| UMICs                              | 0.95 (0.87-1.05) |                         |
| LMICs                              | 1.61 (1.47-1.77) |                         |
| LICs                               | 1.97 (1.73-2.25) |                         |

CI = confidence interval, HICs = high income countries, HR = hazard ratio, LICs = low income countries, LMICs = lower middle-income countries, UMICs = upper middle-income countries.

i) Enrollment as inpatient versus outpatient

|                       | HR (95% CI)      | p-value for interaction |
|-----------------------|------------------|-------------------------|
|                       |                  | <0.001                  |
| Inpatient enrollment  |                  |                         |
| HICs                  | Reference        |                         |
| UMICs                 | 0.93 (0.82-1.06) |                         |
| LMICs                 | 1.27 (1.13-1.43) |                         |
| LICs                  | 1.93 (1.65-2.26) |                         |
| Outpatient enrollment |                  |                         |
| HICs                  | Reference        |                         |
| UMICs                 | 1.04 (0.94-1.16) |                         |
| LMICs                 | 1.73 (1.56-1.92) |                         |
| LICs                  | 2.12 (1.85-2.43) |                         |

CI = confidence interval, HICs = high-income countries, HR = hazard ratio, LICs = low-income countries, LMICs = lower-middle-income countries, UMICs = upper-middle-income countries.

# eFigure 1. Age- and Sex-Standardized Rates of Death and First Hospitalization for Any Cause by Countries Grouped by Income Level

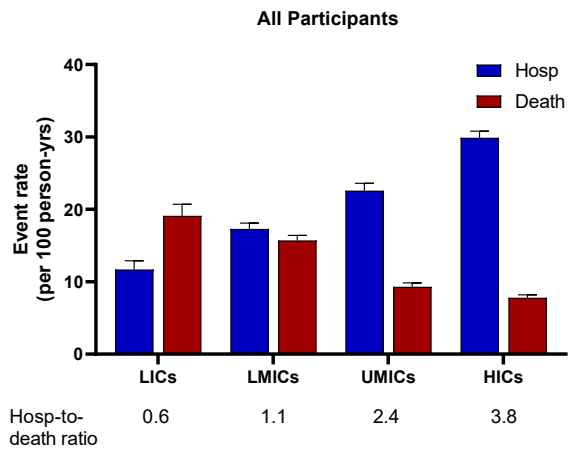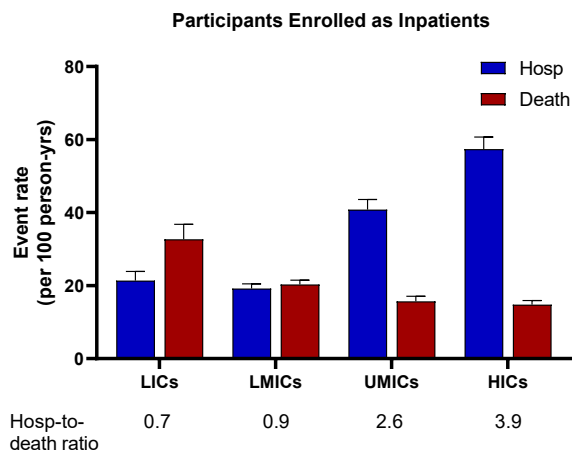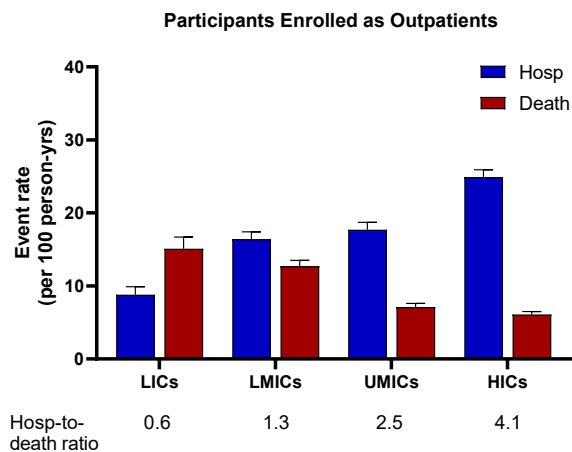

HICs = high-income countries, Hosp = first hospitalization, LICs = low-income countries, LMICs = lower-middle-income countries, UMICs = upper-middle-income countries.



## eFigure 2. Country-Level Correlations of Gross National Income With the Rate of Death and the Rate of First Hospitalization

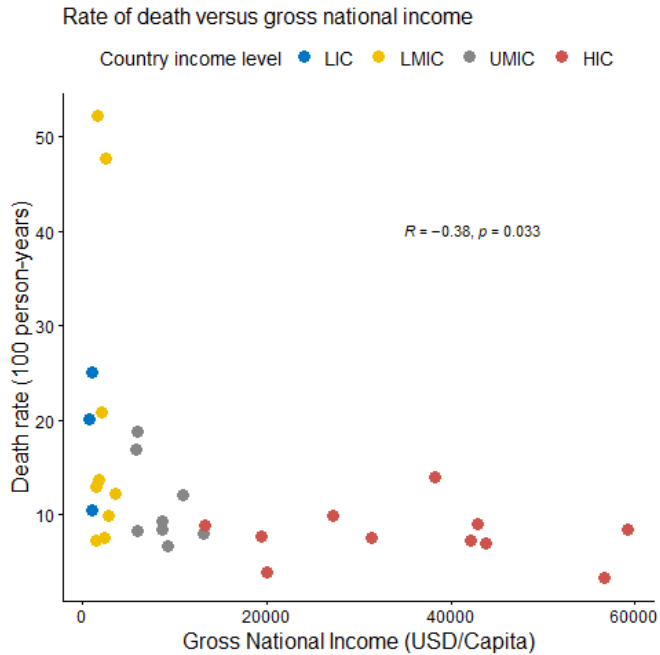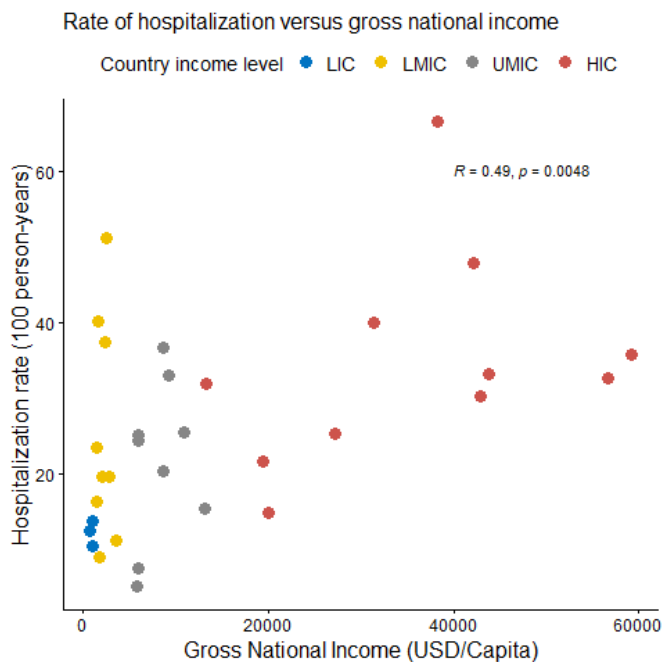

Gross national income per capita using the Atlas method was collected for each country from the World Bank for the year 2017, which represents the first full year of enrollment in the study (<https://data.worldbank.org/indicator/NY.GNP.PCAP.CD>). Mexico, Poland, Mozambique, and the United Kingdom/Ireland were not included because standardized rates of death, and rates of hospitalization, could not be estimated due to small numbers of events in these countries. HICs = high-income countries, LICs = low-income countries, LMICs = lower-middle-income countries, UMICs = upper-middle-income countries, USD = United States Dollars.

**eFigure 3. Crude 30-Day Case Fatality From the Time of the First Hospital Admission, Which Was Due to A) Any Cause, B) Heart Failure, and C) Cause Other Than Heart Failure**

**First hospitalization**

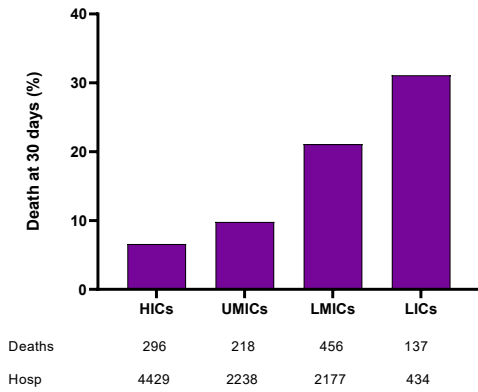

**Heart failure hospitalization**

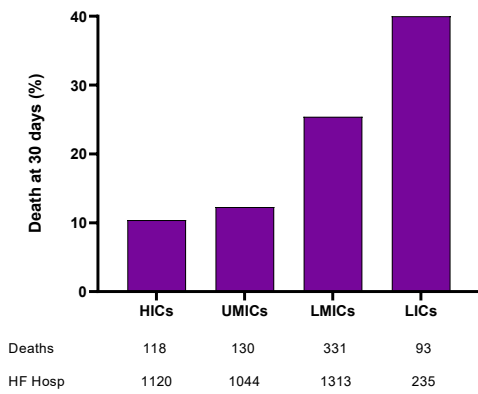

**Non-heart failure hospitalization**

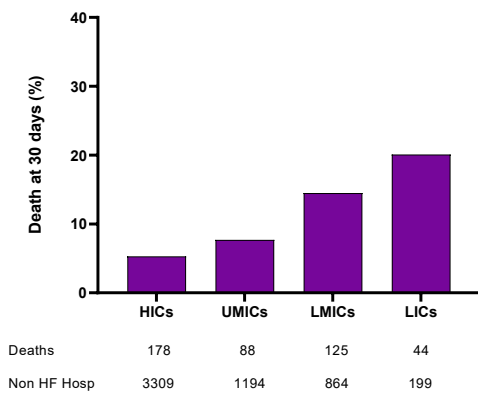

HICs = high-income countries, HF = heart failure, Hosp = first hospitalization, LICs = low-income countries, LMICs = lower-middle-income countries, UMICs = upper-middle-income countries.

## **eAppendix 1. Description of Study Follow-up**

Initial study follow-up was planned for two follow-up visits at twelve and twenty-four months (with interim telephone calls at 6 and 18 months to assess vital status and hospitalizations) following the baseline assessment. Consent was then obtained for a long-term follow-up extension comprised of yearly study visits, which is currently ongoing. During follow-up, data were collected on symptom status, medication usage (with dose), and clinical events. Deaths were recorded, and their causes ascertained by local review of relevant source documents. Morbidity was ascertained by local review of hospitalizations, new diagnoses and interventional or surgical procedures. Additional information was obtained by contacting one of the patient's physicians or next of kin, where possible, and only with prior consent from participants through a patient contact information consent form.

## eAppendix 2. National Leaders (NLs), Principal Investigators (PIs), Co-Investigators (Co-Is), and Sub-Investigators (Sub-Is)

*Study Principal Investigator:* S. Yusuf

*Population Health Research Institute:* P. Joseph, D. Leong, E. Lonn, M. Duong

**Argentina (552\*):** M. L. Diaz and J. M. Dominguez (National Leaders), S. Andrés Nemi, F. A. Bilancieri, S. Cardona, W. P. Casali, M. A. Castoldi, N. Cluigt, M. S. Copponi, G. Cursack, M. S. Cursack, R. G. Duran, C. F. Garcia, J. Hasbani, E. Hasbanl, M. A. Hominal, I. MacKinnon, P. E. Martinez Monferrán, A. Meirino, G. Paterlini, A. Picech, A. Prado, M. Rasmussen, D. G. Rojas, A. Rojas, V. L. Sernia, P. L. Varela, F. M. Venisio, O. G. Vilamajo, C. J. Zaidman, G. Zapata **Botswana (229\*):** J. Mwita (National Leader), E. Botsile, M. Goepamang **Brazil (686\*):** A. Avezum Jr. (National Leader), E. Abib Jr., A. S. Almeida, E. Azeveas, S. Z. Bazan, R. Bazan, L. Berret, B. Biselli, N. Clausell, O. M. Costa, V. De Barros, F. De Martino, L. J. De Paula, L. De Resende, R. De Sousa, W. K. S. B. De Souza, G. De Souza Pantano, M. Del Monaco, D. Drumond, O. P. Dutra, G. Fazolli, J. Ferreira, F. E. Giorgeto, P. G. Goldstein, R. B. Guimaraes, M. E. Hernandez, A. Humberto Vaz, S. Jallad, M. A. Lemos, L. N. Maia, L. Massari, L. F. Medeiros, C. Minelli, M. Nakazone, F. Nobre, L. Oliveira, M. Oliveira, R. Padilha, R. Pavanello, W. Queiroz, G. Reis, E. Rejane, J. G. Rodrigues de Paula, T. L. Scudeler, M. Silva, A. Soeiro, A. Sousa, A. Souza, T. Torres, H. Vaz **Cameroon (1365\*):** A. Dzudie (National Leader), C. K. Kouam, J. P. Abah, S. M. Abang, J. C. Ambassa, P. E. Anou, H. M. Ban'Haka, N. Clovis, S. Colette, S. A. N. Feuzeu, T. G. Fomekong, G. E. Manon, J. Ndjebet, N. Ngai, C. N. Nganou-Gnindjio, F. A. D. Ngongang, A. Nyanga, D. Palmer, N. Pierre, T. W. Sylvie, A. D. Tamdja, C. Tantchou **Canada (1908\*):** C. Alba, A. Al-Hesayen, K. Anderson, M. Barrero, S. Bergeron, M. Bernier, F. Billia, C. Bourgault, B. Cantin, R. Costa, D. Delgado, A. Diaz, A. Ducharme, L. Duchesne, J. Ezekowitz, K. Flores, C.-E. Gagne, M. Garand, D. Hayami, G. Heckman, C. Henri, M.-H. Leblanc, C. Lemay, S. Lepage, N. Lounsbury, M. McDonald, R. McKelvie, G. Moe, J. Morin, K. O'Connor, E. O'Meara, Y. Pépin Dubois, G. Proulx, N. Racine, M. Rajda, P. Rheault, H. Ross, A. Schaffer, M. Senechal, Y. T. Sia, R. Singh, S. Smith, E. Swiggum, M. Toma, F. Tournoux, M. White, A. Yip, S. Zieroth **Chile (359\*):** F. Lanas (National Leader), B. Bobadilla, G. Jano, M. Medina, S. Saavedra, M. Vega **China (1764\*):** J. Zhu and H. Tan (National Leaders), F. Ai, X. Bai, X. Chen, Y. Chen, X. Gao, J. W. Gou, X. Hao, Z. Jia, H. Jiang, W. Jin, T. Liang, X. W. Liang, Y. Liang, H. Y. Luo, J. Peng, S. Qin, L. Ruihong, H. Tan, G. Tan, X. Wang, T. Wang, M. Wang, F. Wei, J. Wu, J. Xu, J. Yanhong, X. Yang, W. Yuanyuan, X. Yun, T. Zheng, W. Zhijun, W. Zhou **Colombia (807\*):** J. Gomez-Mesa (National Leader), T. Alvarez, W. B. Ariza, M. A. Betanar Diaz, J. Buelvas W. A. Buelvas Argumedo, A. Buitrago, A. Cadena Bonfanti, H. Calvo, E. M. M. Carreno, L. A. Caycedo, J. A. Ceron, F. A. T. Dada, V. De La Esprula, D. I. M. De Salazar, S. Del Pilar Baracaldo Gimet, J. E. V. Eljach, A. Garcia, F. Gomez, H. G. Lozada, E. Martinez, J. L. A. Mendoza, A. Monton, G. S. Moreno, N. Murillo, M. M. D. Olite, O. Olite, S. Pardo, A. Patricia, F. Quiroz, S. Redondo, C. E. Rivera, N. Rodríguez, M. Rojas, J. Rueda, J. F. Salazar, J. Sandoval, F. A. Solano, J. M. Valiente, J. E. Vargas Eljach **Denmark (268\*):** K. Kragholm (National Leader), G. Gislason, S. H. Jørgensen, G. Nielsen, M. W. Pedersen, P. V. Rasmussen, P. Søgaaard, H. Wiggers **Ecuador (498\*):** P. Lopez-Jaramillo (National Leader), N. Anzules, S. Carrasco, Y. C. Duarte, I. Herrera, M. S. Jaramillo, D. Jimenez, P. Llomes, F. P. C. Long, J. Lopez, E. Paez, P. Perez, F. Ponce, B. Saenz, F. Trujillo, E. Vargas, M. S. Velez, M. L. Villota, I. Zuelta **Egypt (230\*):** K. Wagdy Shaker (National Leader), P. P. Selwanos, M. Yacoub **France (162\*):** F. Alla (National Leader), R. Boulestreav, N. Bourrelly, N. Delarche, A. Didier, L.-L. Diene, P. Gosse, S. Goussot, J. Paul Guillot, K. H. Hamou, F. Jourda, D. Kenizou, M. Mansour, G. Papaïoannou, E. Rugina, I.-M. Suzanne, J. Michel Tartiere **Germany (1300\*):** G. Ertl (National Leader), T. Wittlinger (National Leader), P. Alger, I. Alsoudi, S.-E. Baller, E. Blank, M. Bockmann, K. Boelmans, M. C Bott, F. Brattinger, S. Brenner,

M. Breunig, O. Bruder, A. Carstguson, V. Cejka, M. Christa, E. Cramer, M. Drexler, J. Friedenberger, P. Goldstein, R. Guimaraes, A. Hagenow, A. Hauber, D. Hausmann, K. Hertting, R. Hintze, W. Ito, A. Jabs, M. Junge, W. Jungmair, C. Kadel, Z. Kiraly, S. Kohler, B. Kraus, S. Loebis, B. Lutsyuk, H. Mahrholdt, S. Maier, G. Mentz, H. Mollinger, C. Morbach, Z. Moussaoui, C. Muller, H. Nagele, I. Neufeld, S. Neugebauer, P. Ons, K. Oppenlaender, L. Peters, C. Potolidis, W. Raut, W. Rieker, A. Rieser, S. Schellong, R. Schueler, I. Seifert, M. Specking, M. Speth-Nitschke, F. Stahl, A. Stief, D. Stierle, T. Stoerk, T. Twisselmann, I. Voigt, B. Voigts, M. Weisbach, C. Weiss, S. Wilke, A. Wolf, M. Wurdak, M. Zaczekiewicz, O. Zimmermann **India (2212\*)**: A. Roy (National Leader), J. Abdullakutty, S. Asotra, S. Chandra, H. Chaturvedi, G. Chaudley, D. Desai, J. Georgi, R. Gupta, N. Jathappa, S. Karna, K. P Kumar, B. H. Lokesh, J. S. Makkar, B. Mohan, N. Naik, P. Negi, R. S. Rao, S. Seth, G. Sharma, S. Singh, M. A. Srilakshmi, R. Tandon, A. Tewari, K. Varghese, S. K. Verma, R. Yadav **Italy and Switzerland (577\*)**: A. Maggioni (National Leader), E. Capati, A. Cecchi, A. Cherubini, M. Concilio, F. Cosmi, C. Crljenica, S. D'Orazio, G. M. Francese, A. Frisinghelli, M. Gnemmi, M. Gulizia, C. Marcassa, T. Moccetti, R. Nuti, F. Orso, M. Palvarini, E. Pasotti, G. Piccinni, M. Piepoli, M. Rossi, G. Russo, F. R. Scopigni, P. Temporelli, F. Venturi, A. Verde, G. Q Villani **Kenya (290\*)**: G. Yonga (National Leader), F. Barasa, E. Mbugua, W. Nalwa **Mexico (51\*)**: J. A. Magaña Serrano (National Leader), R. K. N. Carrasco, E. Castro-Montes, P. G. D. Flores, J. A. C Lopez, M. Silva, M. Vazquez **Mozambique (146\*)**: A. Damasceno (National Leader) **Nepal (342\*)**: S. Sharma (National Leader), Y. Bhatta, N. Bhurtyal, S. Gautam, T. Y. Ghising, V. Kattel, D. R. Mishra, A. Rai, R. Rana, R. Sapkota, D. Sharma, N. Shrestha, S. L. Shrestha, M. Subedi, R. Tamrakar, P. M. Tripathi **Nigeria (1290\*)**: K. Karaye (National Leader), H. Abubakar, V. Ansa, N. Ishaq, A. Kabir, O. Ogah, H. Saidu **Pakistan (421\*)**: K. Kazmi (National Leader), B. Ahmed, A. Artani, A. M. Kayani, A. Laghari, R. Munir **Philippines (130\*)**: A. Dans (National Leader), J. Cruz, L. K. Evangelista, M. Mercado, D. Morales, D. Sulit, L. Tirador, C. Trompeta **Poland (708\*)**: A. Budaj (National Leader), S. Anna, M. Bajer, J. Bednarski, A. Chmielinski, M. Ciuraj-Hanczarek, K. Cymerman, A. Czepiel, T. Czerski, D. Dabrowski, J. Gebalska, M. Gmytrasiewicz, J. Gniot, M. Grelak, U. Grochowicz, T. Imiela, M. Korol, C. Lewandowski, U. Matys, B. Mierzejewska, B. Miklaszewicz, E. Mirek-Bryniarska, A. Nowak, M. Owsiak, Ł. Pastwa, J. Patryn, E. Piechocka, M. Piepiorka, R. Sicursa, M. Skorski, M. Solkiewicz, A. Stasiwski, W. Sudnik, M. Wujkowski **Portugal (145\*)**: J. Silva Cardoso (National Leader), A. Baptista, J. Cabral, A. Cavalheiro, C. Ferreira, A. R. Godinho, L. Marques, A. Meto, E. Moreira, D. Seabra, H. Vasconcelos, A. Andrade, I. Moreira **Russia (602\*)**: N. Pogosova (National Leader), S. Isakova, S. Ivan, N. Kovalkova, D. Panov, A. Salbieva, Z. Sergey, Y. Yufereva, A. Yusubova, V. Gafarov, I. Osipova, T. Tatiana Poponina, Y. Pozdnyakov, Z. Sizova **Saudi Arabia (903\*)**: K. Alhabib (National Leader), S. Alasmari, K. Alghalayini, M. Elreadaisy, W. A. Habeeb, Y. Kassim, A. Kinsara, S. Lawand, S. Monem, U. Ullah Jan, M. Zeyad **South Africa (111\*)**: K. Sliwa (National Leader), M. De Andrade, J. Fortein, K. Moeketsi, P. A. Moses, M. J. Mphahlele, M. Ntsekhe, N. T. Poswa, A. Ratsela, B. M. Thomas, K. M. Thomas, C. Viljoen, A. Xana, Y. S. I. N. Yiga **Spain (572\*)**: A. Bayes-Genis (National Leader), L. C. Belarte Tornero, S. R. Bustillo, E. B. Caballero, J. C. Castillo, R. De La Espriella, I. P. Garrido Bravo, J. Lopez, D. Mallon, M. C. Marcos, G. Minana, M. J. Paniagua Martin, F. Perez, J. L. Roses, E. Santiago, I. Zegri Reiriz, **Sudan (504\*)**: A. ElSayed (National Leader) **Sweden and Iceland (486\*)**: L. Lund (National Leader), S. Bandh, N. Z Floderer, V. Goloskokova, C. Hage, C.-J. Lindholm, J. Lindström, I. Lönnberg, E. Marosi, D. Nurring, J. Sandstrom, T. Thorvaldsen, J. Thulin, K. Vargova **Tanzania (778\*)**: A. Makubi (National Leader), B. Alphonse, E. Alphonse, P. Chillo, N. Duma, R. Fabiano, M. Janabi, F. Kalokola, S. Kanenda, J. Kataraihya, P. Kisenge, J. R. Meda, R. Mutagayma, B. Mwakalukwa, R. Vogt, H. Vogt **Turkey (493\*)**: A. Temizhan (National Leader), D. R. Acar, Y. Çavuşoğlu, A. Celik, H. E. O. Cetin, A. A. Erenoglu, S. Gulec, N. Ozyuncu, M. B. Yilmaz **Uganda (644\*)**: C. Mondo (National Leader), C. Lugero, Z. W. Zhu, **Ukraine (505\*)**: A. Parkhomenko (National Leader), S. Andriyevska, L. Chernachuk, S. Fedorov, E. Filatova, I. Kozlova, N. Lipkan, K. Lobanova, S. Oleksandr, V. Pidlisna, V. Plohotnyk, S. Shvaykin, K. Valentyna, O. Verbovska, L. Vereschuk, L. Voronkov, Y. Zalisna, Y. Zalizna, N. Zenchenco **United Arab Emirates (198\*)**: A. Almulla (National Leader), M. Elbanna, G. Gabra, I. Hamour, M. Khalil, B. Mohamed, J.

K. Praveen, H. Sabbour, M. Soliman, ***United Kingdom and Ireland (322\*)***: M. O'Donnell (National Leader), C. Arden, J. Barton, P. Donnelly, T. Edwards, J. Foster, A. Fuat, A. Jackson, Z. Jan, P. Jhund, B. Mcadam, N. McAleavy, A. Moriarty, A. Murphy, C. Orr, F. Witherow ***United States of America (783\*)***: K. Branch and J. Probstfield (National Leaders), F. Adler, S. Airhart, M. Aldridge, R. Arimie, M. Arnold, D. Brautigam, K. Breathett, N. Christian, A. Desai, M. Friedman, H. Gaggin, C. Galvin, R. Gopalan, T. Gorman, M. Gulati, M. Hutchinson, N. Ibrahim, M. Jones, E. Juneman, T. Kitchen, W. J. Kostis, K. Lotun, V. Malhotra, K. Maurice, R. Mehta, M. A. Meier, M. Meirer, A. E. Moreyra, S. Murthy, R. V. Patak, I. Piña, R. Shetty, N. K. Sweitzer, J. Tauras, S. Thew, J. Vivian, M. Wagmeister, S. Westfall, D. Whellan
