# Supplementary material
Source: PubMed Central journal article supplement (PMC10189564)
Supplement: jama-e235942-s002.pdf [file jama-e235942-s002.pdf]

## Supplemental Online Content: Nonauthor Collaborators

\*First name, last name, and suffix (if applicable) are required and will appear in PubMed.

| *Group Name(s): Global Congestive Heart Failure (G-CHF) Investigators |            |                       |                  |                                                     |                                          |                                                         |                                                                                            |
|-----------------------------------------------------------------------|------------|-----------------------|------------------|-----------------------------------------------------|------------------------------------------|---------------------------------------------------------|--------------------------------------------------------------------------------------------|
| *First Name and Middle Initial(s)                                     | *Last Name | *Suffix (eg, Jr, III) | Academic Degrees | Institution                                         | Location (city, state/province, country) | Role or Contribution, eg, chair, principal investigator | Group (if more than 1 Group listed in the byline) and/or Subgroup (eg, Steering Committee) |
| Mariela                                                               | Rasmussen  |                       | MD               | Instituto de investigaciones clinicas               | Argentina                                | Principal Investigator                                  | Investigator                                                                               |
| Aldo                                                                  | Prado      |                       | MD               | Centro Privado de Cardiología                       | Argentina                                | Principal Investigator                                  | Investigator                                                                               |
| Miguel A.                                                             | Hominal    |                       | MD               | CENTRO DE INVESTIGACIONES CLINICAS DEL LITORAL      | Argentina                                | Principal Investigator                                  | Investigator                                                                               |
| Cesar J.                                                              | Zaidman    |                       | MD               | CIPREC                                              | Argentina                                | Principal Investigator                                  | Investigator                                                                               |
| Guillermo                                                             | Cursack    |                       | MD               | Sanatorio Esperanza                                 | Argentina                                | Principal Investigator                                  | Investigator                                                                               |
| Ignacio                                                               | MacKinnon  |                       | MD               | Instituto de Investigaciones Clínicas Mar del Plata | Argentina                                | Principal Investigator                                  | Investigator                                                                               |
| Gerardo                                                               | Zapata     |                       | MD               | Instituto Cardiovascular de Rosario                 | Argentina                                | Principal Investigator                                  | Investigator                                                                               |
| David G.                                                              | Rojas      |                       | MD               | Consultorios Rojas                                  | Argentina                                | Principal Investigator                                  | Investigator                                                                               |
| Ruben G.                                                              | Duran      |                       | MD               | Instituto de Investigaciones Clinicas San Nicolas   | Argentina                                | Principal Investigator                                  | Investigator                                                                               |
| Oscar G.                                                              | Vilamajo   |                       | MD               | Sanatorio San Martín                                | Argentina                                | Principal Investigator                                  | Investigator                                                                               |
| Oscar P.                                                              | Dutra      |                       | MD               | Instituto de Cardiologia RS                         | Brazil                                   | Principal Investigator                                  | Investigator                                                                               |
| Lívia                                                                 | Oliveira   |                       | PhD              | Universidade Federal do Triângulo Mineiro           | Brazil                                   | Principal Investigator                                  | Investigator                                                                               |
| Ricardo                                                               | Pavanello  |                       | MD               | Dante Pazzanese Institute of Cardiology             | Brazil                                   | Principal Investigator                                  | Investigator                                                                               |
| César                                                                 | Minelli    |                       | MD               | Hospital Carlos Fernando Malzoni                    | Brazil                                   | Principal Investigator                                  | Investigator                                                                               |
| Antonio                                                               | Sousa      |                       | MD               | Hospital Sao Lucas                                  | Brazil                                   | Principal Investigator                                  | Investigator                                                                               |
| Lília N.                                                              | Maia       |                       | MD               | Hospital de Base, University Hospital               | Brazil                                   | Principal Investigator                                  | Investigator                                                                               |
| Mauro E.                                                              | Hernandes  |                       | MD               | Santa casa de Votuporanga                           | Brazil                                   | Principal Investigator                                  | Investigator                                                                               |
| Múcio                                                                 | Oliveira   |                       | MD               | Instituto do Coração - InCor                        | Brazil                                   | Principal Investigator                                  | Investigator                                                                               |
| Weimar K. S. B.                                                       | De Souza   |                       | MD               | Via Medica Centro Clinico                           | Brazil                                   | Principal Investigator                                  | Investigator                                                                               |
| Fernando                                                              | Nobre      |                       | MD               | Rua Bernardino de Campos 912                        | Brazil                                   | Principal Investigator                                  | Investigator                                                                               |

## Supplemental Online Content: Nonauthor Collaborators

\*First name, last name, and suffix (if applicable) are required and will appear in PubMed.

| <b>*First Name and Middle Initial(s)</b> | <b>*Last Name</b> | <b>*Suffix (eg, Jr, III)</b> | <b>Academic Degrees</b> | <b>Institution</b>                                                               | <b>Location (city, state/province, country)</b> | <b>Role or Contribution, eg, chair, principal investigator</b> | <b>Group (if more than 1 Group listed in the byline) and/or Subgroup (eg, Steering Committee)</b> |
|------------------------------------------|-------------------|------------------------------|-------------------------|----------------------------------------------------------------------------------|-------------------------------------------------|----------------------------------------------------------------|---------------------------------------------------------------------------------------------------|
| Nadine                                   | Clausell          |                              | MD                      | Hospital de Clinicas de Porto Alegre                                             | Brazil                                          | Principal Investigator                                         | Investigator                                                                                      |
| Eduardo                                  | Abib              | Jr                           | MD                      | Scentryphar Clinical Research Ltd                                                | Brazil                                          | Principal Investigator                                         | Investigator                                                                                      |
| Silmeia Z.                               | Bazan             |                              | MD                      | Unesp - Faculdade de Medicina de Botucatu                                        | Brazil                                          | Principal Investigator                                         | Investigator                                                                                      |
| Gilmar                                   | Reis              |                              | PhD                     | Cardresearch - Cardiologia Assistencial E De Pesquisa                            | Brazil                                          | Principal Investigator                                         | Investigator                                                                                      |
| Nkoke                                    | Clovis            |                              | MD                      | Buea Regional hospital                                                           | Cameroon                                        | Principal Investigator                                         | Investigator                                                                                      |
| Cabral                                   | Tantchou          |                              | MD                      | Cardiac Centre, St. Elizabeth catholic general Hospital Shisong                  | Cameroon                                        | Principal Investigator                                         | Investigator                                                                                      |
| Joseph P.                                | Abah              |                              | MD                      | Military Hospital Douala                                                         | Cameroon                                        | Principal Investigator                                         | Investigator                                                                                      |
| Charles K.                               | Kouam             |                              | MD                      | Bafoussam Regional Hospital                                                      | Cameroon                                        | Principal Investigator                                         | Investigator                                                                                      |
| Anastase D.                              | Tamdja            |                              | PhD                     | Douala General Hospital                                                          | Cameroon                                        | Principal Investigator                                         | Investigator                                                                                      |
| Guillaume E.                             | Manon             |                              | MD                      | Hopital de District de Biyemassi                                                 | Cameroon                                        | Principal Investigator                                         | Investigator                                                                                      |
| Serah M.                                 | Abang             |                              | MD                      | Mboppi Baptist Hospital Douala                                                   | Cameroon                                        | Principal Investigator                                         | Investigator                                                                                      |
| Stachys A. N.                            | Feuzeu            |                              | MD                      | Hopital de District de Deido                                                     | Cameroon                                        | Principal Investigator                                         | Investigator                                                                                      |
| Herve M.                                 | Ban'Haka          |                              | MD                      | Hopital Regional Annexe d' EDEA                                                  | Cameroon                                        | Principal Investigator                                         | Investigator                                                                                      |
| Chris N.                                 | Nganou-Gnindjio   |                              | MD                      | Yaoundé Central Hospital                                                         | Cameroon                                        | Principal Investigator                                         | Investigator                                                                                      |
| Sih                                      | Colette           |                              | MD                      | Mbingo Baptist Hospital                                                          | Cameroon                                        | Principal Investigator                                         | Investigator                                                                                      |
| Albert                                   | Nyanga            |                              | MD                      | Mbingo Baptist Hospital                                                          | Cameroon                                        | Principal Investigator                                         | Investigator                                                                                      |
| Tchinda G.                               | Fomekong          |                              | MD                      | Mbingo Baptist Hospital                                                          | Cameroon                                        | Principal Investigator                                         | Investigator                                                                                      |
| Jules                                    | Ndjebet           |                              | MD                      | Centre Cardiovasculaire de Douala                                                | Cameroon                                        | Principal Investigator                                         | Investigator                                                                                      |
| Florent A. D.                            | Ngongang          |                              | MD                      | Clinique Coeur et Vie                                                            | Cameroon                                        | Principal Investigator                                         | Investigator                                                                                      |
| Kim                                      | Anderson          |                              | MD                      | Nova Scotia Health Authority-Central Zone                                        | Canada                                          | Principal Investigator                                         | Investigator                                                                                      |
| Serge                                    | Lepage            |                              | MD                      | Centre Intégré Universitaire de Santé de L'Estrie-CHUS (CIUSSS de L'Estrie CHUS) | Canada                                          | Principal Investigator                                         | Investigator                                                                                      |

## Supplemental Online Content: Nonauthor Collaborators

\*First name, last name, and suffix (if applicable) are required and will appear in PubMed.

| <b>*First Name and Middle Initial(s)</b> | <b>*Last Name</b> | <b>*Suffix (eg, Jr, III)</b> | <b>Academic Degrees</b> | <b>Institution</b>                                                                                           | <b>Location (city, state/province, country)</b> | <b>Role or Contribution, eg, chair, principal investigator</b> | <b>Group (if more than 1 Group listed in the byline) and/or Subgroup (eg, Steering Committee)</b> |
|------------------------------------------|-------------------|------------------------------|-------------------------|--------------------------------------------------------------------------------------------------------------|-------------------------------------------------|----------------------------------------------------------------|---------------------------------------------------------------------------------------------------|
| Francois                                 | Tournoux          |                              | MD                      | CHUM (Centre Hospitalier de l'Université de Montréal)                                                        | Canada                                          | Principal Investigator                                         | Investigator                                                                                      |
| Normand                                  | Racine            |                              | MD                      | Montreal Heart Institute                                                                                     | Canada                                          | Principal Investigator                                         | Investigator                                                                                      |
| Stuart                                   | Smith             |                              | MD                      | London Health Sciences Centre                                                                                | Canada                                          | Principal Investigator                                         | Investigator                                                                                      |
| Robert                                   | McKelvie          |                              | MD                      | London Health Sciences Centre                                                                                | Canada                                          | Principal Investigator                                         | Investigator                                                                                      |
| Gordon                                   | Moe               |                              | MD                      | St. Michael's Hospital                                                                                       | Canada                                          | Principal Investigator                                         | Investigator                                                                                      |
| Shelley                                  | Zieroth           |                              | MD                      | St. Boniface Hospital                                                                                        | Canada                                          | Principal Investigator                                         | Investigator                                                                                      |
| Mustafa                                  | Toma              |                              | MD                      | The University of British Columbia and Providence Health Care Society                                        | Canada                                          | Principal Investigator                                         | Investigator                                                                                      |
| Ying T.                                  | Sia               |                              | MD                      | Centre intégré universitaire de santé et services sociaux de la Mauricie-et-du-Centre-du-Québec (CIUSSS MCQ) | Canada                                          | Principal Investigator                                         | Investigator                                                                                      |
| George                                   | Heckman           |                              | MD                      | St. Mary's General Hospital                                                                                  | Canada                                          | Principal Investigator                                         | Investigator                                                                                      |
| Heather                                  | Ross              |                              | MD                      | University Health Network                                                                                    | Canada                                          | Principal Investigator                                         | Investigator                                                                                      |
| Justin                                   | Ezekowitz         |                              | MD                      | University of Alberta                                                                                        | Canada                                          | Principal Investigator                                         | Investigator                                                                                      |
| Mario                                    | Senechal          |                              | MD                      | Institut Universitaire de Cardiologie et de Pneumologie de Québec - Université Laval                         | Canada                                          | Principal Investigator                                         | Investigator                                                                                      |
| Elizabeth                                | Swiggum           |                              | MD                      | Victoria Heart Institute Foundation & Vancouver Island Health Authority                                      | Canada                                          | Principal Investigator                                         | Investigator                                                                                      |
| Mario                                    | Vega              |                              | MD                      | Estudios Clinicos Barros Luco                                                                                | Chile                                           | Principal Investigator                                         | Investigator                                                                                      |
| Gabriel                                  | Jano              |                              | MD                      | Hospital Lautaro                                                                                             | Chile                                           | Principal Investigator                                         | Investigator                                                                                      |
| Braulio                                  | Bobadilla         |                              | MD                      | CESFAM Padre Las Casas                                                                                       | Chile                                           | Principal Investigator                                         | Investigator                                                                                      |
| Huiqiong                                 | Tan               |                              | MD                      | Fuwai Hospital                                                                                               | China                                           | Principal Investigator                                         | Investigator                                                                                      |
| Jian W.                                  | Gou               |                              | MD                      | Huangcun Town Daxing District Peking City Hospital                                                           | China                                           | Principal Investigator                                         | Investigator                                                                                      |

## Supplemental Online Content: Nonauthor Collaborators

\*First name, last name, and suffix (if applicable) are required and will appear in PubMed.

| <b>*First Name and Middle Initial(s)</b> | <b>*Last Name</b> | <b>*Suffix (eg, Jr, III)</b> | <b>Academic Degrees</b> | <b>Institution</b>                                                | <b>Location (city, state/province, country)</b> | <b>Role or Contribution, eg, chair, principal investigator</b> | <b>Group (if more than 1 Group listed in the byline) and/or Subgroup (eg, Steering Committee)</b> |
|------------------------------------------|-------------------|------------------------------|-------------------------|-------------------------------------------------------------------|-------------------------------------------------|----------------------------------------------------------------|---------------------------------------------------------------------------------------------------|
| Wei                                      | Jin               |                              | PhD                     | Ruijin Hospital, Shanghai Jiao Tong University School of Medicine | China                                           | Principal Investigator                                         | Investigator                                                                                      |
| Heng                                     | Jiang             |                              | MD                      | Shanghai Songjiang District Central Hospital                      | China                                           | Principal Investigator                                         | Investigator                                                                                      |
| Fen                                      | Ai                |                              | PhD                     | The Central Hospital of Wuhan, Tongji Medical College             | China                                           | Principal Investigator                                         | Investigator                                                                                      |
| Wenxiu                                   | Zhou              |                              | MD                      | Wuhan Red Cross Hospital                                          | China                                           | Principal Investigator                                         | Investigator                                                                                      |
| Hai Y.                                   | Luo               |                              | MD                      | Hefeng Country Central Hospital, Hubei Province                   | China                                           | Principal Investigator                                         | Investigator                                                                                      |
| Fang                                     | Wei               |                              | MD                      | Jinan City Central Hospital, Shandong Province                    | China                                           | Principal Investigator                                         | Investigator                                                                                      |
| Zhisheng                                 | Jia               |                              | MD                      | The Fifth People's Hospital of Jinan City                         | China                                           | Principal Investigator                                         | Investigator                                                                                      |
| Jie                                      | Peng              |                              | MD                      | The Fifth People's Hospital of Jinan City                         | China                                           | Co-Investigator                                                | Investigator                                                                                      |
| Xiuhong                                  | Wang              |                              | MD                      | Xingcun Town Hospital of Sishui County, Shandong Province         | China                                           | Principal Investigator                                         | Investigator                                                                                      |
| Xiaojuan                                 | Bai               |                              | PhD                     | Shengjing Hospital of China Medical University                    | China                                           | Principal Investigator                                         | Investigator                                                                                      |
| Jing                                     | Xu                |                              | PhD                     | Liaoning Electric Power Central Hospital                          | China                                           | Principal Investigator                                         | Investigator                                                                                      |
| Xue W.                                   | Liang             |                              | MD                      | Anshan City Geriatric Rehabilitation Hospital                     | China                                           | Principal Investigator                                         | Investigator                                                                                      |
| XiaoPing                                 | Chen              |                              | PhD                     | West China Hospital                                               | China                                           | Principal Investigator                                         | Investigator                                                                                      |
| Tianxun                                  | Wang              |                              | MD                      | The First People's Hospital of Guang Yuan                         | China                                           | Principal Investigator                                         | Investigator                                                                                      |
| Tinlin                                   | Zheng             |                              | MD                      | Cheng Du Aerospace Hospital                                       | China                                           | Principal Investigator                                         | Investigator                                                                                      |
| Shaoming                                 | Qin               |                              | MD                      | Guangxi People's Hospital of Zhuang Autonomous Region             | China                                           | Principal Investigator                                         | Investigator                                                                                      |

## Supplemental Online Content: Nonauthor Collaborators

\*First name, last name, and suffix (if applicable) are required and will appear in PubMed.

| *First Name and Middle Initial(s) | *Last Name | *Suffix (eg, Jr, III) | Academic Degrees | Institution                                                                          | Location (city, state/province, country) | Role or Contribution, eg, chair, principal investigator | Group (if more than 1 Group listed in the byline) and/or Subgroup (eg, Steering Committee) |
|-----------------------------------|------------|-----------------------|------------------|--------------------------------------------------------------------------------------|------------------------------------------|---------------------------------------------------------|--------------------------------------------------------------------------------------------|
| Tao                               | Liang      |                       | MD               | Guangxi Hechi City People's Hospital                                                 | China                                    | Principal Investigator                                  | Investigator                                                                               |
| Gange                             | Tan        |                       | MD               | Huanjiang County People's Hospital                                                   | China                                    | Principal Investigator                                  | Investigator                                                                               |
| Xia                               | Gao        |                       | MD               | Xinjiang Production and Construction Corps Hospital                                  | China                                    | Principal Investigator                                  | Investigator                                                                               |
| Yunguo                            | Chen       |                       | PhD              | The Fourth Division Hospital, Xinjiang Production and Construction Corps Agriculture | China                                    | Principal Investigator                                  | Investigator                                                                               |
| Jijin                             | Wu         |                       | MD               | The 36 Regiment Hospital, Xinjiang Production and Construction Corp.                 | China                                    | Principal Investigator                                  | Investigator                                                                               |
| Angel                             | Garcia     |                       | MD               | Hospital Universitario San Ignacio                                                   | Colombia                                 | Principal Investigator                                  | Investigator                                                                               |
| Nelson                            | Murillo    |                       | MD               | ANGIOGRAFIA DE OCCIDENTE/<br>CLINICA DE OCCIDENTE                                    | Colombia                                 | Principal Investigator                                  | Investigator                                                                               |
| Juan A.                           | Ceron      |                       | MD               | Centro de Investigacion Fundacion Cometa                                             | Colombia                                 | Principal Investigator                                  | Investigator                                                                               |
| Dora I. M.                        | De Salazar |                       | MD               | Asociacion IPS Medicos internistas de Caldas                                         | Colombia                                 | Principal Investigator                                  | Investigator                                                                               |
| Jorge                             | Sandoval   |                       | MD               | Cardiologia siglo xxi                                                                | Colombia                                 | Principal Investigator                                  | Investigator                                                                               |
| Andres                            | Buitrago   |                       | MD               | Fundación SantaFe de Bogota                                                          | Colombia                                 | Principal Investigator                                  | Investigator                                                                               |
| Julian E. V.                      | Eljach     |                       | MD               | Asociacion IPS Medicos internistas de Caldas                                         | Colombia                                 | Principal Investigator                                  | Investigator                                                                               |
| Jose L. A.                        | Mendoza    |                       | MD               | IPS Centro Cientifico Aasistencial SAS                                               | Colombia                                 | Principal Investigator                                  | Investigator                                                                               |
| Gustavo S.                        | Moreno     |                       | MD               | Funcentra IPS & Ipsum Clinical LLS (SAS)                                             | Colombia                                 | Principal Investigator                                  | Investigator                                                                               |
| Henry G.                          | Lozada     |                       | MD               | Fundacion Centro de Invstigaciones Biomedicas Riescard                               | Colombia                                 | Principal Investigator                                  | Investigator                                                                               |

## Supplemental Online Content: Nonauthor Collaborators

\*First name, last name, and suffix (if applicable) are required and will appear in PubMed.

| *First Name and Middle Initial(s) | *Last Name      | *Suffix (eg, Jr, III) | Academic Degrees | Institution                                                  | Location (city, state/province, country) | Role or Contribution, eg, chair, principal investigator | Group (if more than 1 Group listed in the byline) and/or Subgroup (eg, Steering Committee) |
|-----------------------------------|-----------------|-----------------------|------------------|--------------------------------------------------------------|------------------------------------------|---------------------------------------------------------|--------------------------------------------------------------------------------------------|
| Erika M. M.                       | Carreno         |                       | MD               | Instituto de rehabilitacion cardiopulmonar del caribe        | Colombia                                 | Principal Investigator                                  | Investigator                                                                               |
| Franklin                          | Quiroz          |                       | MD               | FUNDACIÓN DE INVESTIGACIONES MEDICAS SAN GIL - IPS           | Colombia                                 | Principal Investigator                                  | Investigator                                                                               |
| Alberto                           | Cadena Bonfanti |                       | MD               | Clínica de la Costa Ltda                                     | Colombia                                 | Principal Investigator                                  | Investigator                                                                               |
| Jannes                            | Buelvas         |                       | MD               | Cardiodiagnostico                                            | Colombia                                 | Principal Investigator                                  | Investigator                                                                               |
| Fredy A. T.                       | Dada            |                       | MD               | Corazon IPS SAS                                              | Colombia                                 | Principal Investigator                                  | Investigator                                                                               |
| Peter                             | Sogaard         |                       | PhD              | Aalborg University Hospital                                  | Denmark                                  | Principal Investigator                                  | Investigator                                                                               |
| Maria                             | Pedersen        |                       | MD               | Aalborg University Hospital                                  | Denmark                                  | Co-Investigator                                         | Investigator                                                                               |
| Gunnar                            | Gislason        |                       | PhD              | Gentofte Hospital                                            | Denmark                                  | Principal Investigator                                  | Investigator                                                                               |
| Gitte                             | Nielsen         |                       | MD               | Regionhospitalet Nordjylland                                 | Denmark                                  | Principal Investigator                                  | Investigator                                                                               |
| Henrik                            | Wiggers         |                       | MD               | Aarhus University Hospital                                   | Denmark                                  | Principal Investigator                                  | Investigator                                                                               |
| Milton S.                         | Jaramillo       |                       | MD               | Calle Octava Oeste No y San Jorge                            | Ecuador                                  | Co-Investigator                                         | Investigator                                                                               |
| Nicholas                          | Anzules         |                       | MD               | Calle Octava Oeste No y San Jorge                            | Ecuador                                  | Co-Investigator                                         | Investigator                                                                               |
| Yan C.                            | Duarte          |                       | MD               | Unicornmed S. A.                                             | Ecuador                                  | Principal Investigator                                  | Investigator                                                                               |
| Freddy P. C.                      | Long            |                       | MD               | Consultorio                                                  | Ecuador                                  | Principal Investigator                                  | Investigator                                                                               |
| Iván                              | Zuelta          |                       | MD               | AMCOR                                                        | Ecuador                                  | Principal Investigator                                  | Investigator                                                                               |
| Mayra S.                          | Velez           |                       | MD               | ONCOGAMA                                                     | Ecuador                                  | Principal Investigator                                  | Investigator                                                                               |
| José                              | Lopez           |                       | MD               | Hospital Militar Quito                                       | Ecuador                                  | Principal Investigator                                  | Investigator                                                                               |
| Freddy                            | Trujillo        |                       | MD               | Hospital General Enrique Garcés                              | Ecuador                                  | Principal Investigator                                  | Investigator                                                                               |
| Santiago                          | Carrasco        |                       | MD               | Club de Leones                                               | Ecuador                                  | Principal Investigator                                  | Investigator                                                                               |
| Sadi                              | Gulec           |                       | MD               | Ankara University School of Medicine                         | Turkey                                   | Principal Investigator                                  | Investigator                                                                               |
| Yuksel                            | Cavusoglu       |                       | MD               | Eskisehir Osmangazi University                               | Turkey                                   | Principal Investigator                                  | Investigator                                                                               |
| Deniz R.                          | Acar            |                       | MD               | KARTAL KOSUYOLU YUKSEK IHTISAS EGITIM VE ARASTIRMA HASTANESI | Turkey                                   | Principal Investigator                                  | Investigator                                                                               |

## Supplemental Online Content: Nonauthor Collaborators

\*First name, last name, and suffix (if applicable) are required and will appear in PubMed.

| *First Name and Middle Initial(s) | *Last Name  | *Suffix (eg, Jr, III) | Academic Degrees | Institution                                                                                                                                                                                                                       | Location (city, state/province, country) | Role or Contribution, eg, chair, principal investigator | Group (if more than 1 Group listed in the byline) and/or Subgroup (eg, Steering Committee) |
|-----------------------------------|-------------|-----------------------|------------------|-----------------------------------------------------------------------------------------------------------------------------------------------------------------------------------------------------------------------------------|------------------------------------------|---------------------------------------------------------|--------------------------------------------------------------------------------------------|
| Mehmet B.                         | Yilmaz      |                       | PhD              | Innovation Cardiology Research Development Training Consulting Health Services Medical Drugs and Devices Import Export Trade Limited Company, TechnoPark and Faculty of Medicine, Department of Cardiology, Cumhuriyet University | Turkey                                   | Principal Investigator                                  | Investigator                                                                               |
| Ahmet                             | Celik       |                       | PhD              | Mersin University Medical Faculty                                                                                                                                                                                                 | Turkey                                   | Principal Investigator                                  | Investigator                                                                               |
| Philippe                          | Gosse       |                       | MD               | Hospital Saint André                                                                                                                                                                                                              | France                                   | Principal Investigator                                  | Investigator                                                                               |
| David                             | Kenizou     |                       | MD               | Groupe hospitalier de la région de Mulhouse et Sud Alsace                                                                                                                                                                         | France                                   | Principal Investigator                                  | Investigator                                                                               |
| Nicolas                           | Delarche    |                       | MD               | Centre Hospitalier François Mitterrand                                                                                                                                                                                            | France                                   | Principal Investigator                                  | Investigator                                                                               |
| Romain                            | Boulestreav |                       | MD               | Centre Hospitalier de Pau                                                                                                                                                                                                         | France                                   | Co-Investigator                                         | Investigator                                                                               |
| Samuel                            | Goussot     |                       | MD               | Centre Hospitalier D'Auxerre                                                                                                                                                                                                      | France                                   | Co-Investigator                                         | Investigator                                                                               |
| Kamel H.                          | Hamou       |                       | MD               | Centre Hospitalier D'Auxerre                                                                                                                                                                                                      | France                                   | Co-Investigator                                         | Investigator                                                                               |
| Francois                          | Jourda      |                       | MD               | Centre Hospitalier d'Auxerre                                                                                                                                                                                                      | France                                   | Principal Investigator                                  | Investigator                                                                               |
| Jean Paul                         | Guillot     |                       | MD               | Centre Hospitalier de Bayeux                                                                                                                                                                                                      | France                                   | Principal Investigator                                  | Investigator                                                                               |
| Jean Michel                       | Tartiere    |                       | MD               | Chits Toulon Sainte Musse                                                                                                                                                                                                         | France                                   | Principal Investigator                                  | Investigator                                                                               |
| Sebastian                         | Schellong   |                       | PhD              | Städtisches Klinikum Dresden II. Medizinische Klinik                                                                                                                                                                              | Germany                                  | Principal Investigator                                  | Investigator                                                                               |
| Heiko                             | Mahrholdt   |                       | PhD              | Robert-Bosch-Krankenhaus Abteilung für Kardiologie                                                                                                                                                                                | Germany                                  | Principal Investigator                                  | Investigator                                                                               |
| Wolfgang                          | Jungmair    |                       | MD               | Kardiologische Praxis                                                                                                                                                                                                             | Germany                                  | Principal Investigator                                  | Investigator                                                                               |
| Christoph                         | Kadel       |                       | MD               | Klinikum Frankfurt Höchst                                                                                                                                                                                                         | Germany                                  | Principal Investigator                                  | Investigator                                                                               |
| Alexander                         | Wolf        |                       | MD               | Elisabeth Krankenhaus Essen                                                                                                                                                                                                       | Germany                                  | Principal Investigator                                  | Investigator                                                                               |
| Oliver                            | Bruder      |                       | MD               | Elisabeth Krankenhaus Essen                                                                                                                                                                                                       | Germany                                  | Principal Investigator                                  | Investigator                                                                               |
| Michael C                         | Bott        |                       | MD               | GPR klinikum gGmbH                                                                                                                                                                                                                | Germany                                  | Principal Investigator                                  | Investigator                                                                               |
| Herbert                           | Nagele      |                       | PhD              | Albertinen-Krankenhaus                                                                                                                                                                                                            | Germany                                  | Principal Investigator                                  | Investigator                                                                               |
| Klaus                             | Hertting    |                       | MD               | Klinikum Buchholz                                                                                                                                                                                                                 | Germany                                  | Principal Investigator                                  | Investigator                                                                               |

## Supplemental Online Content: Nonauthor Collaborators

\*First name, last name, and suffix (if applicable) are required and will appear in PubMed.

| *First Name and Middle Initial(s) | *Last Name   | *Suffix (eg, Jr, III) | Academic Degrees | Institution                                                                           | Location (city, state/province, country) | Role or Contribution, eg, chair, principal investigator | Group (if more than 1 Group listed in the byline) and/or Subgroup (eg, Steering Committee) |
|-----------------------------------|--------------|-----------------------|------------------|---------------------------------------------------------------------------------------|------------------------------------------|---------------------------------------------------------|--------------------------------------------------------------------------------------------|
| Wulf                              | Ito          |                       | PhD              | Herz- und Gefäßzentrum Oberallgäu Kempten, campus Klinik Immenstadtand Campus Kempten | Germany                                  | Principal Investigator                                  | Investigator                                                                               |
| Rene                              | Hintze       |                       | MD               | Studienzentrum der kardiologischen Praxigemeinschaft                                  | Germany                                  | Principal Investigator                                  | Investigator                                                                               |
| Fabian                            | Stahl        |                       | MD               | Kardiologie am Tibarg Studiengesellschaft                                             | Germany                                  | Principal Investigator                                  | Investigator                                                                               |
| Sebastian                         | Maier        |                       | PhD              | Klinikum St. Elisabeth                                                                | Germany                                  | Principal Investigator                                  | Investigator                                                                               |
| Christian                         | Weiss        |                       | PhD              | Klinikum Lueneburg                                                                    | Germany                                  | Principal Investigator                                  | Investigator                                                                               |
| Thomas                            | Stoerk       |                       | PhD              | CardioPraxis Staufen - University Ulm                                                 | Germany                                  | Principal Investigator                                  | Investigator                                                                               |
| Michael                           | Drexler      |                       | MD               | Cardiopraxis Mainz                                                                    | Germany                                  | Principal Investigator                                  | Investigator                                                                               |
| Andreas                           | Hagenow      |                       | MD               | Praxis Dr. Hagenow                                                                    | Germany                                  | Principal Investigator                                  | Investigator                                                                               |
| Sanjeev                           | Asotra       |                       | MD               | Indira Gandhi Medical College                                                         | India                                    | Co-Investigator                                         | Investigator                                                                               |
| Gaurav                            | Chaudley     |                       | MD               | King George's Medical University                                                      | India                                    | Co-Investigator                                         | Investigator                                                                               |
| Rajeev                            | Gupta        |                       | MD               | Eternal Heart Care Centre and Research Institute                                      | India                                    | Principal Investigator                                  | Investigator                                                                               |
| Bishav                            | Mohan        |                       | MD               | Dayanand Medical College & Hospital                                                   | India                                    | Principal Investigator                                  | Investigator                                                                               |
| Narendra                          | Jathappa     |                       | MD               | Nanjappa Life Care                                                                    | India                                    | Principal Investigator                                  | Investigator                                                                               |
| Kiron                             | Varghese     |                       | PhD              | St. John's Medical College Hospital                                                   | India                                    | Principal Investigator                                  | Investigator                                                                               |
| Jabir                             | Abdullakutty |                       | MD               | Lisie Hospital                                                                        | India                                    | Principal Investigator                                  | Investigator                                                                               |
| Parkash                           | Negi         |                       | PhD              | Indira Gandhi Medical College                                                         | India                                    | Principal Investigator                                  | Investigator                                                                               |
| Sunil                             | Karna        |                       | MD               | Charutar Arogya Mandal                                                                | India                                    | Principal Investigator                                  | Investigator                                                                               |
| Sharad                            | Chandra      |                       | MD               | King George's Medical University                                                      | India                                    | Principal Investigator                                  | Investigator                                                                               |



## Supplemental Online Content: Nonauthor Collaborators

\*First name, last name, and suffix (if applicable) are required and will appear in PubMed.

| *First Name and Middle Initial(s) | *Last Name    | *Suffix (eg, Jr, III) | Academic Degrees | Institution                                                                                                  | Location (city, state/province, country) | Role or Contribution, eg, chair, principal investigator | Group (if more than 1 Group listed in the byline) and/or Subgroup (eg, Steering Committee) |
|-----------------------------------|---------------|-----------------------|------------------|--------------------------------------------------------------------------------------------------------------|------------------------------------------|---------------------------------------------------------|--------------------------------------------------------------------------------------------|
| Giulia                            | Russo         |                       | MD               | SC Centro Cardiovascolare e medicina dello Sport of the Azienda Sanitaria Universitaria Integrata di Trieste | Italy                                    | Principal Investigator                                  | Investigator                                                                               |
| Franco                            | Cosmi         |                       | MD               | U.O.C. Cardiology P.O. La Fratta                                                                             | Italy                                    | Principal Investigator                                  | Investigator                                                                               |
| Simona                            | D'Orazio      |                       | MD               | U.O.C. Cardiology P.O. La Fratta                                                                             | Italy                                    | Principal Investigator                                  | Investigator                                                                               |
| Michele                           | Gulizia       |                       | MD               | ARNAS Garibaldi - National and High Specialization Institution                                               | Italy                                    | Principal Investigator                                  | Investigator                                                                               |
| Tiziano                           | Mocchetti     |                       | MD               | Cardiocentro Ticino                                                                                          | Switzerland                              | Principal Investigator                                  | Investigator                                                                               |
| Francesca                         | Scopigni      |                       | MD               | Cardiocentro Ticino                                                                                          | Switzerland                              | Principal Investigator                                  | Investigator                                                                               |
| Claudio                           | Marcassa      |                       | MD               | ICS Maugeri S.p.A. S.B.                                                                                      | Italy                                    | Principal Investigator                                  | Investigator                                                                               |
| Anna                              | Frasinghelli  |                       | MD               | ASST Rhodense                                                                                                | Italy                                    | Principal Investigator                                  | Investigator                                                                               |
| Giovanni Q                        | Villani       |                       | MD               | Azienda USL of Piacenza                                                                                      | Italy                                    | Principal Investigator                                  | Investigator                                                                               |
| Flavio                            | Venturi       |                       | MD               | Azienda USL Toscana Centro                                                                                   | Italy                                    | Principal Investigator                                  | Investigator                                                                               |
| Giancarlo                         | Piccinni      |                       | MD               | Azienda Sanitaria Locale Lecce                                                                               | Italy                                    | Principal Investigator                                  | Investigator                                                                               |
| Massimo                           | Piepoli       |                       | MD               | L'Azienda USL di Piacenza                                                                                    | Italy/Switzerland                        | Principal Investigator                                  | Investigator                                                                               |
| Giulia                            | Russo         |                       | MD               | Azienda Sanitaria Universitaria Integrata di Trieste - A.S.U.I.Ts                                            | Italy/Switzerland                        | Principal Investigator                                  | Investigator                                                                               |
| Wafula                            | Nalwa         |                       | MD               | Jaramogi Oginga Odinga Referral & Teaching Hospital (JOORTH)                                                 | Kenya                                    | Co-Investigator                                         | Investigator                                                                               |
| Evelyn                            | Mbugua        |                       | MD               | Kijabe Hospital                                                                                              | Kenya                                    | Principal Investigator                                  | Investigator                                                                               |
| Felix                             | Barasa        |                       | MD               | Moi Teaching and Referral Hospital                                                                           | Kenya                                    | Principal Investigator                                  | Investigator                                                                               |
| Eliodoro                          | Castro-Montes |                       | MD               | Instituto del Corazón de Querétaro                                                                           | Mexico                                   | Principal Investigator                                  | Investigator                                                                               |
| Jose A. C.                        | Lopez         |                       | MD               | Clinica De Diagnostico Y Tratamiento Cardiovascular                                                          | Mexico                                   | Principal Investigator                                  | Investigator                                                                               |
| Yadav                             | Bhatta        |                       | MD               | Norvic International Hospital                                                                                | Nepal                                    | Principal Investigator                                  | Investigator                                                                               |
| Deewakar                          | Sharma        |                       | MD               | Shahid Gangalal National Heart Centre                                                                        | Nepal                                    | Principal Investigator                                  | Investigator                                                                               |

## Supplemental Online Content: Nonauthor Collaborators

\*First name, last name, and suffix (if applicable) are required and will appear in PubMed.

| *First Name and Middle Initial(s) | *Last Name   | *Suffix (eg, Jr, III) | Academic Degrees | Institution                                                                                          | Location (city, state/province, country) | Role or Contribution, eg, chair, principal investigator | Group (if more than 1 Group listed in the byline) and/or Subgroup (eg, Steering Committee) |
|-----------------------------------|--------------|-----------------------|------------------|------------------------------------------------------------------------------------------------------|------------------------------------------|---------------------------------------------------------|--------------------------------------------------------------------------------------------|
| Victor                            | Ansa         |                       | PhD              | University of Calabar Teaching Hospital                                                              | Nigeria                                  | Principal Investigator                                  | Investigator                                                                               |
| Okechukwu                         | Ogah         |                       | MD               | University College Hospital, Ibadan                                                                  | Nigeria                                  | Principal Investigator                                  | Investigator                                                                               |
| Hadiza                            | Saidu        |                       | MD               | Murtala Muhammad Specialist Hospital                                                                 | Nigeria                                  | Principal Investigator                                  | Investigator                                                                               |
| Azhar M.                          | Kayani       |                       | PhD              | Rawalpindi Institute of Cardiology                                                                   | Pakistan                                 | Principal Investigator                                  | Investigator                                                                               |
| Lauren K.                         | Evangelista  |                       | MD               | The University of the Philippines - Philippine General Hospital                                      | Philippines                              | Co-Investigator                                         | Investigator                                                                               |
| Louie                             | Tirador      |                       | MD               | St. Paul's Hospital                                                                                  | Philippines                              | Principal Investigator                                  | Investigator                                                                               |
| Josefina                          | Cruz         |                       | MD               | Palawan Medical City                                                                                 | Philippines                              | Principal Investigator                                  | Investigator                                                                               |
| Dante                             | Morales      |                       | MD               | Manila Doctors Hospital                                                                              | Philippines                              | Principal Investigator                                  | Investigator                                                                               |
| Dennis                            | Sulit        |                       | MD               | Quirino Memorial Medical Center                                                                      | Philippines                              | Principal Investigator                                  | Investigator                                                                               |
| Janusz                            | Bednarski    |                       | MD               | Samodzielny Publiczny Specjalistyczny Szpital Zachodni im. Jana Pawła II, Oddział Kardiologii        | Poland                                   | Principal Investigator                                  | Investigator                                                                               |
| Tomasz                            | Czerski      |                       | MD               | Hospital Wegrow Department of Internal Medicine and Cardiology                                       | Poland                                   | Principal Investigator                                  | Investigator                                                                               |
| Marcin                            | Skorski      |                       | MD               | SP ZOZ Leczna                                                                                        | Poland                                   | Principal Investigator                                  | Investigator                                                                               |
| Krzysztof                         | Cymerman     |                       | MD               | Indywidualna Specjalistyczna Praktyka Lekarska w Dziedzinie Kardiologii lek. Med. Krzysztof Cymerman | Poland                                   | Principal Investigator                                  | Investigator                                                                               |
| Marek                             | Korol        |                       | MD               | Osrodek Medycyny Rodzinnej                                                                           | Poland                                   | Principal Investigator                                  | Investigator                                                                               |
| Beata                             | Miklaszewicz |                       | MD               | Cardiamed                                                                                            | Poland                                   | Principal Investigator                                  | Investigator                                                                               |
| Marek                             | Piepiorka    |                       | MD               | Gabinet Kardiologiczno-Internistyczny                                                                | Poland                                   | Principal Investigator                                  | Investigator                                                                               |
| Marek                             | Wujkowski    |                       | MD               | Specjalistyczne Gabinety Lekarskie Medicare Plus                                                     | Poland                                   | Principal Investigator                                  | Investigator                                                                               |

## Supplemental Online Content: Nonauthor Collaborators

\*First name, last name, and suffix (if applicable) are required and will appear in PubMed.

| <b>*First Name and Middle Initial(s)</b> | <b>*Last Name</b> | <b>*Suffix (eg, Jr, III)</b> | <b>Academic Degrees</b> | <b>Institution</b>                                     | <b>Location (city, state/province, country)</b> | <b>Role or Contribution, eg, chair, principal investigator</b> | <b>Group (if more than 1 Group listed in the byline) and/or Subgroup (eg, Steering Committee)</b> |
|------------------------------------------|-------------------|------------------------------|-------------------------|--------------------------------------------------------|-------------------------------------------------|----------------------------------------------------------------|---------------------------------------------------------------------------------------------------|
| Ewa                                      | Mirek-Bryniarska  |                              | MD                      | Department of Cardiology, J Dietl Hospital             | Poland                                          | Principal Investigator                                         | Investigator                                                                                      |
| Michal                                   | Owsiak            |                              | MD                      | Department of Cardiology, J Dietl Hospital             | Poland                                          | Principal Investigator                                         | Investigator                                                                                      |
| Jacek                                    | Gniot             |                              | MD                      | Szpital Specjalistyczny w Pulawach                     | Poland                                          | Principal Investigator                                         | Investigator                                                                                      |
| Arkadiusz                                | Stasiwski         |                              | MD                      | Niepubliczny Zaklad Opieki Zdrowotnej                  | Poland                                          | Principal Investigator                                         | Investigator                                                                                      |
| Monika                                   | Solkiewicz        |                              | MD                      | Niepubliczny Zaklad Opieki Zdrowotnej                  | Poland                                          | Principal Investigator                                         | Investigator                                                                                      |
| Wanda                                    | Sudnik            |                              | MD                      | Centrum Medyczne Dr. Sudnik                            | Poland                                          | Principal Investigator                                         | Investigator                                                                                      |
| Arkadiusz                                | Chmielinski       |                              | MD                      | Grupa Zdrowie Arkadiusz Chmielinski                    | Poland                                          | Principal Investigator                                         | Investigator                                                                                      |
| Aurora                                   | Andrade           |                              | MD                      | Centro Hospitalar Tâmega e Sousa                       | Portugal                                        | Principal Investigator                                         | Investigator                                                                                      |
| Ilidio                                   | Moreira           |                              | MD                      | CHTMAD, Hospital Vila Real                             | Portugal                                        | Principal Investigator                                         | Investigator                                                                                      |
| Svetlana                                 | Isakova           |                              | MD                      | National Research Center for Preventive Medicine       | Russia                                          | Co-Investigator                                                | Investigator                                                                                      |
| Shvedov                                  | Ivan              |                              | MD                      | Municipal Institution City Clinical Hospital Zhukovsky | Russia                                          | Co-Investigator                                                | Investigator                                                                                      |
| Natalia                                  | Kovalkova         |                              | MD                      | Institute of Internal and Preventive Medicine          | Russia                                          | Co-Investigator                                                | Investigator                                                                                      |
| Dmitry                                   | Panov             |                              | MD                      | Institute of Internal and Preventive Medicine          | Russia                                          | Co-Investigator                                                | Investigator                                                                                      |
| Anzhela                                  | Salbieva          |                              | MD                      | National Research Center for Preventive Medicine       | Russia                                          | Co-Investigator                                                | Investigator                                                                                      |
| Zabashta                                 | Sergey            |                              | MD                      | Municipal Institution City Clinical Hospital Zhukovsky | Russia                                          | Co-Investigator                                                | Investigator                                                                                      |
| Yulia                                    | Yufereva          |                              | MD                      | National Research Center for Preventive Medicine       | Russia                                          | Co-Investigator                                                | Investigator                                                                                      |
| Anara                                    | Yusubova          |                              | MD                      | National Research Center for Preventive Medicine       | Russia                                          | Co-Investigator                                                | Investigator                                                                                      |

## Supplemental Online Content: Nonauthor Collaborators

\*First name, last name, and suffix (if applicable) are required and will appear in PubMed.

| *First Name and Middle Initial(s) | *Last Name  | *Suffix (eg, Jr, III) | Academic Degrees | Institution                                                                      | Location (city, state/province, country) | Role or Contribution, eg, chair, principal investigator | Group (if more than 1 Group listed in the byline) and/or Subgroup (eg, Steering Committee) |
|-----------------------------------|-------------|-----------------------|------------------|----------------------------------------------------------------------------------|------------------------------------------|---------------------------------------------------------|--------------------------------------------------------------------------------------------|
| Tatiana                           | Poponina    |                       | MD               | Siberian State Medical University                                                | Russia                                   | Principal Investigator                                  | Investigator                                                                               |
| Valery                            | Gafarov     |                       | MD               | Institute of Internal and Preventive Medicine                                    | Russia                                   | Principal Investigator                                  | Investigator                                                                               |
| Irina                             | Osipova     |                       | MD               | Altay State Medical University                                                   | Russia                                   | Principal Investigator                                  | Investigator                                                                               |
| Yury                              | Pozdnyakov  |                       | MD               | Municipal Institution City Clinical Hospital Zhukovsky                           | Russia                                   | Principal Investigator                                  | Investigator                                                                               |
| Zhanna                            | Sizova      |                       | MD               | Russia I.M. Sechenov First Moscow State Medical University (Sechenov University) | Russia                                   | Principal Investigator                                  | Investigator                                                                               |
| Waleed                            | Habeeb      |                       | MD               | King Fahad Cardiac Center (KFCC)                                                 | Saudi Arabia                             | Co-Investigator                                         | Investigator                                                                               |
| Yasser                            | Kassim      |                       | MD               | Prince Mohammad Bin Abdulaziz Hospital (PMAH)                                    | Saudi Arabia                             | Co-Investigator                                         | Investigator                                                                               |
| Salwa                             | Monem       |                       | MD               | Dallah Hospital                                                                  | Saudi Arabia                             | Co-Investigator                                         | Investigator                                                                               |
| Mohamed                           | Zeyad       |                       | MD               | Dallah Hospital                                                                  | Saudi Arabia                             | Co-Investigator                                         | Investigator                                                                               |
| Sami                              | Alasmari    |                       | MD               | Prince Mohammed Bin Abdulaziz Hospital                                           | Saudi Arabia                             | Principal Investigator                                  | Investigator                                                                               |
| Kamal                             | Alghalayini |                       | MD               | King Abdulaziz University Hospital                                               | Saudi Arabia                             | Principal Investigator                                  | Investigator                                                                               |
| Abdulhalim                        | Kinsara     |                       | PhD              | King Abdulaziz Medical City                                                      | Saudi Arabia                             | Principal Investigator                                  | Investigator                                                                               |
| Ubaid                             | Ullah Jan   |                       | MD               | King Khalid Hospital, Al-Kharj, KSA                                              | Saudi Arabia                             | Principal Investigator                                  | Investigator                                                                               |
| Samih                             | Lawand      |                       | MD               | Dallah Hospital                                                                  | Saudi Arabia                             | Principal Investigator                                  | Investigator                                                                               |
| Makgotsane J.                     | Mphahlele   |                       | MD               | Sefako Makgatho Health Sciences University                                       | South Africa                             | Co-Investigator                                         | Investigator                                                                               |
| Khulile                           | Moeketsi    |                       | MD               | Nelson Mandela Central Hospital/WSU                                              | South Africa                             | Co-Investigator                                         | Investigator                                                                               |
| Mpiko                             | Ntsekhe     |                       | PhD              | The University of Cape Town                                                      | South Africa                             | Principal Investigator                                  | Investigator                                                                               |
| Andrew                            | Ratsela     |                       | PhD              | Pietersburg Mankweng Hospital Complex                                            | South Africa                             | Principal Investigator                                  | Investigator                                                                               |
| Baby M.                           | Thomas      |                       | PhD              | Nelson Mandela Central Hospital/WSU                                              | South Africa                             | Principal Investigator                                  | Investigator                                                                               |
| Eduardo B.                        | Caballero   |                       | MD               | Complejo Hospitalario Universitario A Coruña                                     | Spain                                    | Co-Investigator                                         | Investigator                                                                               |

## Supplemental Online Content: Nonauthor Collaborators

\*First name, last name, and suffix (if applicable) are required and will appear in PubMed.

| *First Name and Middle Initial(s) | *Last Name      | *Suffix (eg, Jr, III) | Academic Degrees | Institution                                                       | Location (city, state/province, country) | Role or Contribution, eg, chair, principal investigator | Group (if more than 1 Group listed in the byline) and/or Subgroup (eg, Steering Committee) |
|-----------------------------------|-----------------|-----------------------|------------------|-------------------------------------------------------------------|------------------------------------------|---------------------------------------------------------|--------------------------------------------------------------------------------------------|
| Rafael                            | De La Espriella |                       | MD               | Hospital Clínico Universitario de Valenci                         | Spain                                    | Co-Investigator                                         | Investigator                                                                               |
| Iris                              | Garrido Bravo   |                       | MD               | Hospital Clínico Universitario Virgen de la Arrixaca              | Spain                                    | Co-Investigator                                         | Investigator                                                                               |
| Gema                              | Minan           |                       | MD               | Hospital Clínico Universitario de Valenci                         | Spain                                    | Co-Investigator                                         | Investigator                                                                               |
| Maria J.                          | Paniagua Martin |                       | MD               | Complejo Hospitalario Universitario A Coruña                      | Spain                                    | Co-Investigator                                         | Investigator                                                                               |
| Francisco                         | Perez           |                       | MD               | Hospital Clínico Universitario Virgen de la Arrixaca              | Spain                                    | Co-Investigator                                         | Investigator                                                                               |
| Josep L.                          | Roses           |                       | MD               | Hospital Universitari Germans Trias i Pujol                       | Spain                                    | Co-Investigator                                         | Investigator                                                                               |
| Evelyn                            | Santiago        |                       | MD               | Hospital Universitari Germans Trias i Pujol                       | Spain                                    | Co-Investigator                                         | Investigator                                                                               |
| Valentina                         | Goloskokova     |                       | MD               | Sahlgrenska University Hospital/Ostra Hospital                    | Sweden/Iceland                           | Co-Investigator                                         | Investigator                                                                               |
| Jorgen                            | Thulin          |                       | MD               | Capio Citykliniken Hjartmottagningen                              | Sweden/Iceland                           | Co-Investigator                                         | Investigator                                                                               |
| Tonje                             | Thorvaldsen     |                       | MD               | Karolinska University Hospital                                    | Sweden/Iceland                           | Co-Investigator                                         | Investigator                                                                               |
| Carl-Johan                        | Lindholm        |                       | MD               | Capio Citykliniken Hjartmottagningen                              | Sweden                                   | Principal Investigator                                  | Investigator                                                                               |
| Nagy Z                            | Floderer        |                       | MD               | Centralsjukhuset, Department of Heart and Acute Medicine Karlstad | Sweden                                   | Principal Investigator                                  | Investigator                                                                               |
| Ingemar                           | Lönnberg        |                       | MD               | Hospital of Västmanland                                           | Sweden                                   | Principal Investigator                                  | Investigator                                                                               |
| Said                              | Kanenda         |                       | MD               | Bugando Medical Center                                            | Tanzania                                 | Co-Investigator                                         | Investigator                                                                               |
| Neema                             | Duma            |                       | MD               | Brigita Dispensary                                                | Tanzania                                 | Co-Investigator                                         | Investigator                                                                               |
| John R.                           | Meda            |                       | MD               | Benjamin Mkapa Hospital                                           | Tanzania                                 | Principal Investigator                                  | Investigator                                                                               |
| Pilly                             | Chillo          |                       | MD               | Muhimbili University of Health and Allied Sciences                | Tanzania                                 | Principal Investigator                                  | Investigator                                                                               |
| Rainer                            | Vogt            |                       | MD               | Brigita Dispensary                                                | Tanzania                                 | Principal Investigator                                  | Investigator                                                                               |

## Supplemental Online Content: Nonauthor Collaborators

\*First name, last name, and suffix (if applicable) are required and will appear in PubMed.

| <b>*First Name and Middle Initial(s)</b> | <b>*Last Name</b> | <b>*Suffix (eg, Jr, III)</b> | <b>Academic Degrees</b> | <b>Institution</b>                                           | <b>Location (city, state/province, country)</b> | <b>Role or Contribution, eg, chair, principal investigator</b> | <b>Group (if more than 1 Group listed in the byline) and/or Subgroup (eg, Steering Committee)</b> |
|------------------------------------------|-------------------|------------------------------|-------------------------|--------------------------------------------------------------|-------------------------------------------------|----------------------------------------------------------------|---------------------------------------------------------------------------------------------------|
| Fredrick                                 | Kalokola          |                              | MD                      | Bugando Medical Center                                       | Tanzania                                        | Principal Investigator                                         | Investigator                                                                                      |
| Johannes                                 | Kataraihya        |                              | PhD                     | Bugando Medical Center                                       | Tanzania                                        | Principal Investigator                                         | Investigator                                                                                      |
| Benson                                   | Mwakalukwa        |                              | MD                      | Haydom Lutheran Hospital                                     | Tanzania                                        | Principal Investigator                                         | Investigator                                                                                      |
| Peter                                    | Kisenge           |                              | MD                      | Jakaya Kikwete Cardiac Institute                             | Tanzania                                        | Principal Investigator                                         | Investigator                                                                                      |
| Hande E. O.                              | Cetin             |                              | MD                      | Turkiye Yuksek Ihtisas Education and Research Hospital       | Turkey                                          | Co-Investigator                                                | Investigator                                                                                      |
| Charles                                  | Lugero            |                              | MD                      | Uganda Heart Institute                                       | Uganda                                          | Principal Investigator                                         | Investigator                                                                                      |
| Leonid                                   | Voronkov          |                              | MD                      | NSC "Strazhesko Institute of Cardiology"                     | Ukraine                                         | Principal Investigator                                         | Investigator                                                                                      |
| Sergiy                                   | Fedorov           |                              | MD                      | Ivano-Frankivsk Central City Hospital                        | Ukraine                                         | Principal Investigator                                         | Investigator                                                                                      |
| Svitlana                                 | Andriyevska       |                              | PhD                     | Odessa regional cardiological dispensary                     | Ukraine                                         | Principal Investigator                                         | Investigator                                                                                      |
| Larysa                                   | Vereschuk         |                              | MD                      | Rivne regional clinical hospital                             | Ukraine                                         | Principal Investigator                                         | Investigator                                                                                      |
| Yulia                                    | Zalizna           |                              | MD                      | Kyiv Regional Cardiology Clinic                              | Ukraine                                         | Principal Investigator                                         | Investigator                                                                                      |
| Pardeep                                  | Jhund             |                              | MD                      | University of Glasgow                                        | United Kingdom                                  | Principal Investigator                                         | Investigator                                                                                      |
| John                                     | Barton            |                              | MD                      | Saolta University Hospital Galway                            | United Kingdom                                  | Principal Investigator                                         | Investigator                                                                                      |
| Andrew                                   | Moriarty          |                              | MD                      | Southern Health & Social Care Trust, Craigavon Area Hospital | United Kingdom                                  | Principal Investigator                                         | Investigator                                                                                      |
| Patrick                                  | Donnelly          |                              | MD                      | South Eastern Trust                                          | United Kingdom                                  | Principal Investigator                                         | Investigator                                                                                      |
| Andrew                                   | Murphy            |                              | PhD                     | Turloughmore Medical Centre                                  | United Kingdom                                  | Principal Investigator                                         | Investigator                                                                                      |
| Tim                                      | Edwards           |                              | MD                      | Dorset County Hospital NHS Foundation Trust                  | United Kingdom                                  | Principal Investigator                                         | Investigator                                                                                      |
| Christopher                              | Arden             |                              | MD                      | Park and St Francis Surgery                                  | United Kingdom                                  | Principal Investigator                                         | Investigator                                                                                      |
| Ahmet                                    | Fuat              |                              | MD                      | Carmel Medical Practice                                      | United Kingdom                                  | Principal Investigator                                         | Investigator                                                                                      |
| Fraser                                   | Witherow          |                              | MD                      | Dorset County Hospital NHS Foundation Trust                  | United Kingdom/Ireland                          | Co-Investigator                                                | Investigator                                                                                      |
| Brendan                                  | Mcadam            |                              | MD                      | BEAUMONT HOSPITAL                                            | United Kingdom                                  | Principal Investigator                                         | Investigator                                                                                      |
| Raluca                                   | Arimie            |                              | MD                      | Northridge Clinical Research Inc.                            | USA                                             | Principal Investigator                                         | Investigator                                                                                      |
| Frederic                                 | Adler             |                              | MD                      | Olive View UCLA Medical Center                               | USA                                             | Principal Investigator                                         | Investigator                                                                                      |
| Kristen                                  | Maurice           |                              | MD                      | Lutheran Hospital                                            | USA                                             | Principal Investigator                                         | Investigator                                                                                      |

## Supplemental Online Content: Nonauthor Collaborators

\*First name, last name, and suffix (if applicable) are required and will appear in PubMed.

| <b>*First Name and Middle Initial(s)</b> | <b>*Last Name</b> | <b>*Suffix (eg, Jr, III)</b> | <b>Academic Degrees</b> | <b>Institution</b>                                                                                                | <b>Location (city, state/province, country)</b> | <b>Role or Contribution, eg, chair, principal investigator</b> | <b>Group (if more than 1 Group listed in the byline) and/or Subgroup (eg, Steering Committee)</b> |
|------------------------------------------|-------------------|------------------------------|-------------------------|-------------------------------------------------------------------------------------------------------------------|-------------------------------------------------|----------------------------------------------------------------|---------------------------------------------------------------------------------------------------|
| Mark A.                                  | Meier             |                              | MD                      | Lutheran Medical Group                                                                                            | USA                                             | Principal Investigator                                         | Investigator                                                                                      |
| Rajendra                                 | Mehta             |                              | MD                      | Rajendra H. Mehta, MD, PC                                                                                         | USA                                             | Principal Investigator                                         | Investigator                                                                                      |
| Timothy                                  | Kitchen           |                              | MD                      | Great Lakes Medical Research                                                                                      | USA                                             | Principal Investigator                                         | Investigator                                                                                      |
| Vinay                                    | Malhotra          |                              | MD                      | MultiCare Health System                                                                                           | USA                                             | Principal Investigator                                         | Investigator                                                                                      |
| David                                    | Whellan           |                              | MD                      | Thomas Jefferson University and Hospitals                                                                         | USA                                             | Principal Investigator                                         | Investigator                                                                                      |
| Illeana                                  | Piña              |                              | MD                      | Montefiore Medical Center                                                                                         | USA                                             | Principal Investigator                                         | Investigator                                                                                      |
| Sandhya                                  | Murthy            |                              | MD                      | Montefiore Medical Center                                                                                         | USA                                             | Principal Investigator                                         | Investigator                                                                                      |
| John                                     | Kostis            |                              | MD                      | Rutgers Robert Wood Johnson Medical School                                                                        | USA                                             | Principal Investigator                                         | Investigator                                                                                      |
| Martha                                   | Gulati            |                              | MD                      | Banner University Medical Center-Phoenix                                                                          | USA                                             | Principal Investigator                                         | Investigator                                                                                      |
| Radha                                    | Gopalan           |                              | MD                      | Banner University Medical Center-Phoenix                                                                          | USA                                             | Principal Investigator                                         | Investigator                                                                                      |
| Hanna                                    | Gaggin            |                              | MD                      | Massachusetts General Hospital                                                                                    | USA                                             | Principal Investigator                                         | Investigator                                                                                      |
| Sophia                                   | Airhart           |                              | PhD                     | The Arizona Board of Regents on behalf of the University of Arizona AND Banner - University Medical Center Tucson | USA                                             | Principal Investigator                                         | Investigator                                                                                      |
| Elizabeth                                | Juneman           |                              | MD                      | The Arizona Board of Regents on behalf of the University of Arizona AND Banner - University Medical Center Tucson | USA                                             | Principal Investigator                                         | Investigator                                                                                      |
| Nancy                                    | Sweitzer          |                              | MD                      | The Arizona Board of Regents on behalf of the University of Arizona AND Banner - University Medical Center Tucson | USA                                             | Principal Investigator                                         | Investigator                                                                                      |
| Stephen                                  | Thew              |                              | MD                      | Kootenai Heart Clinics Northwest                                                                                  | USA                                             | Principal Investigator                                         | Investigator                                                                                      |
