# Supplementary material
Source: PubMed Central journal article supplement (PMC10189564)
Supplement: jama-e235942-s003.pdf [file jama-e235942-s003.pdf]

## **Data Sharing Statement**

Joseph. Global Variations in Heart Failure Etiology, Management, and Outcomes. *JAMA*.  
Published May 16, 2023. doi:10.1001/jama.2023.5942

### **Data**

**Data available:** No
